# Supplementary material
Source: PubMed Central journal article supplement (PMC3361971)

## Supporting Information for

### Antiprotozoal and Antimicrobial Compounds from the Plant Pathogen *Septoria pistaciarum*

Mallika Kumarihamy,<sup>†, ⊥</sup> Shabana I. Khan,<sup>†, ⊥</sup> Melissa Jacob,<sup>†</sup> Babu L. Tekwani,<sup>†</sup> Stephen O. Duke,<sup>‡</sup> Daneel Ferreira,<sup>†, ⊥</sup> and N.P.

Dhammika Nanayakkara<sup>†, \*</sup>

*National Center for Natural Products Research, Research Institute of Pharmaceutical Sciences, and Department of Pharmacognosy, School of Pharmacy, The University of Mississippi, University, Mississippi 38677, and Natural Products Utilization Research Unit, USDA-ARS, University, MS 38677, USA*

| <b>Contents</b>                        | <b>Page</b> |
|----------------------------------------|-------------|
| 1H NMR Spectrum of compound <b>1</b>   | S1          |
| 13 C NMR Spectrum of compound <b>1</b> | S2          |
| 1H NMR Spectrum of compound <b>2</b>   | S3          |
| 13 C NMR Spectrum of compound <b>2</b> | S4          |
| 1H NMR Spectrum of compound <b>3</b>   | S5          |
| 13 C NMR Spectrum of compound <b>3</b> | S8          |
| 1H NMR Spectrum of compound <b>4</b>   | S7          |
| 13 C NMR Spectrum of compound <b>4</b> | S8          |

|                                                              |     |
|--------------------------------------------------------------|-----|
| 1H NMR Spectrum of compound <b>10a</b>                       | S9  |
| 13 C NMR Spectrum of compound <b>10a</b>                     | S10 |
| 1H NMR Spectrum of compound <b>10b</b>                       | S11 |
| 13 C NMR Spectrum of compound <b>10b</b>                     | S12 |
| 1H NMR Spectrum of compound <b>10c</b>                       | S13 |
| 13 C NMR Spectrum of compound <b>10c</b>                     | S14 |
| 1H NMR Spectrum of compound <b>10b</b> at 25 °C in pyridine  | S15 |
| 1H NMR Spectrum of compound <b>10b</b> at 100 °C in pyridine | S16 |
| 1H NMR Spectrum of compound <b>10c</b> at 25 °C in pyridine  | S17 |
| 1H NMR Spectrum of compound <b>10c</b> at 100 °C in pyridine | S18 |

mk6-64-1-3  
Std proton

**COMPOUND 1**

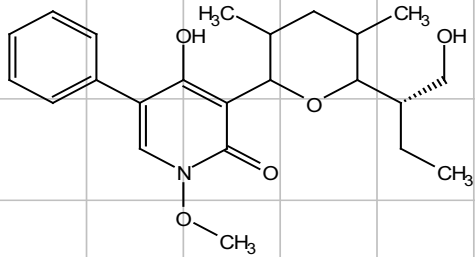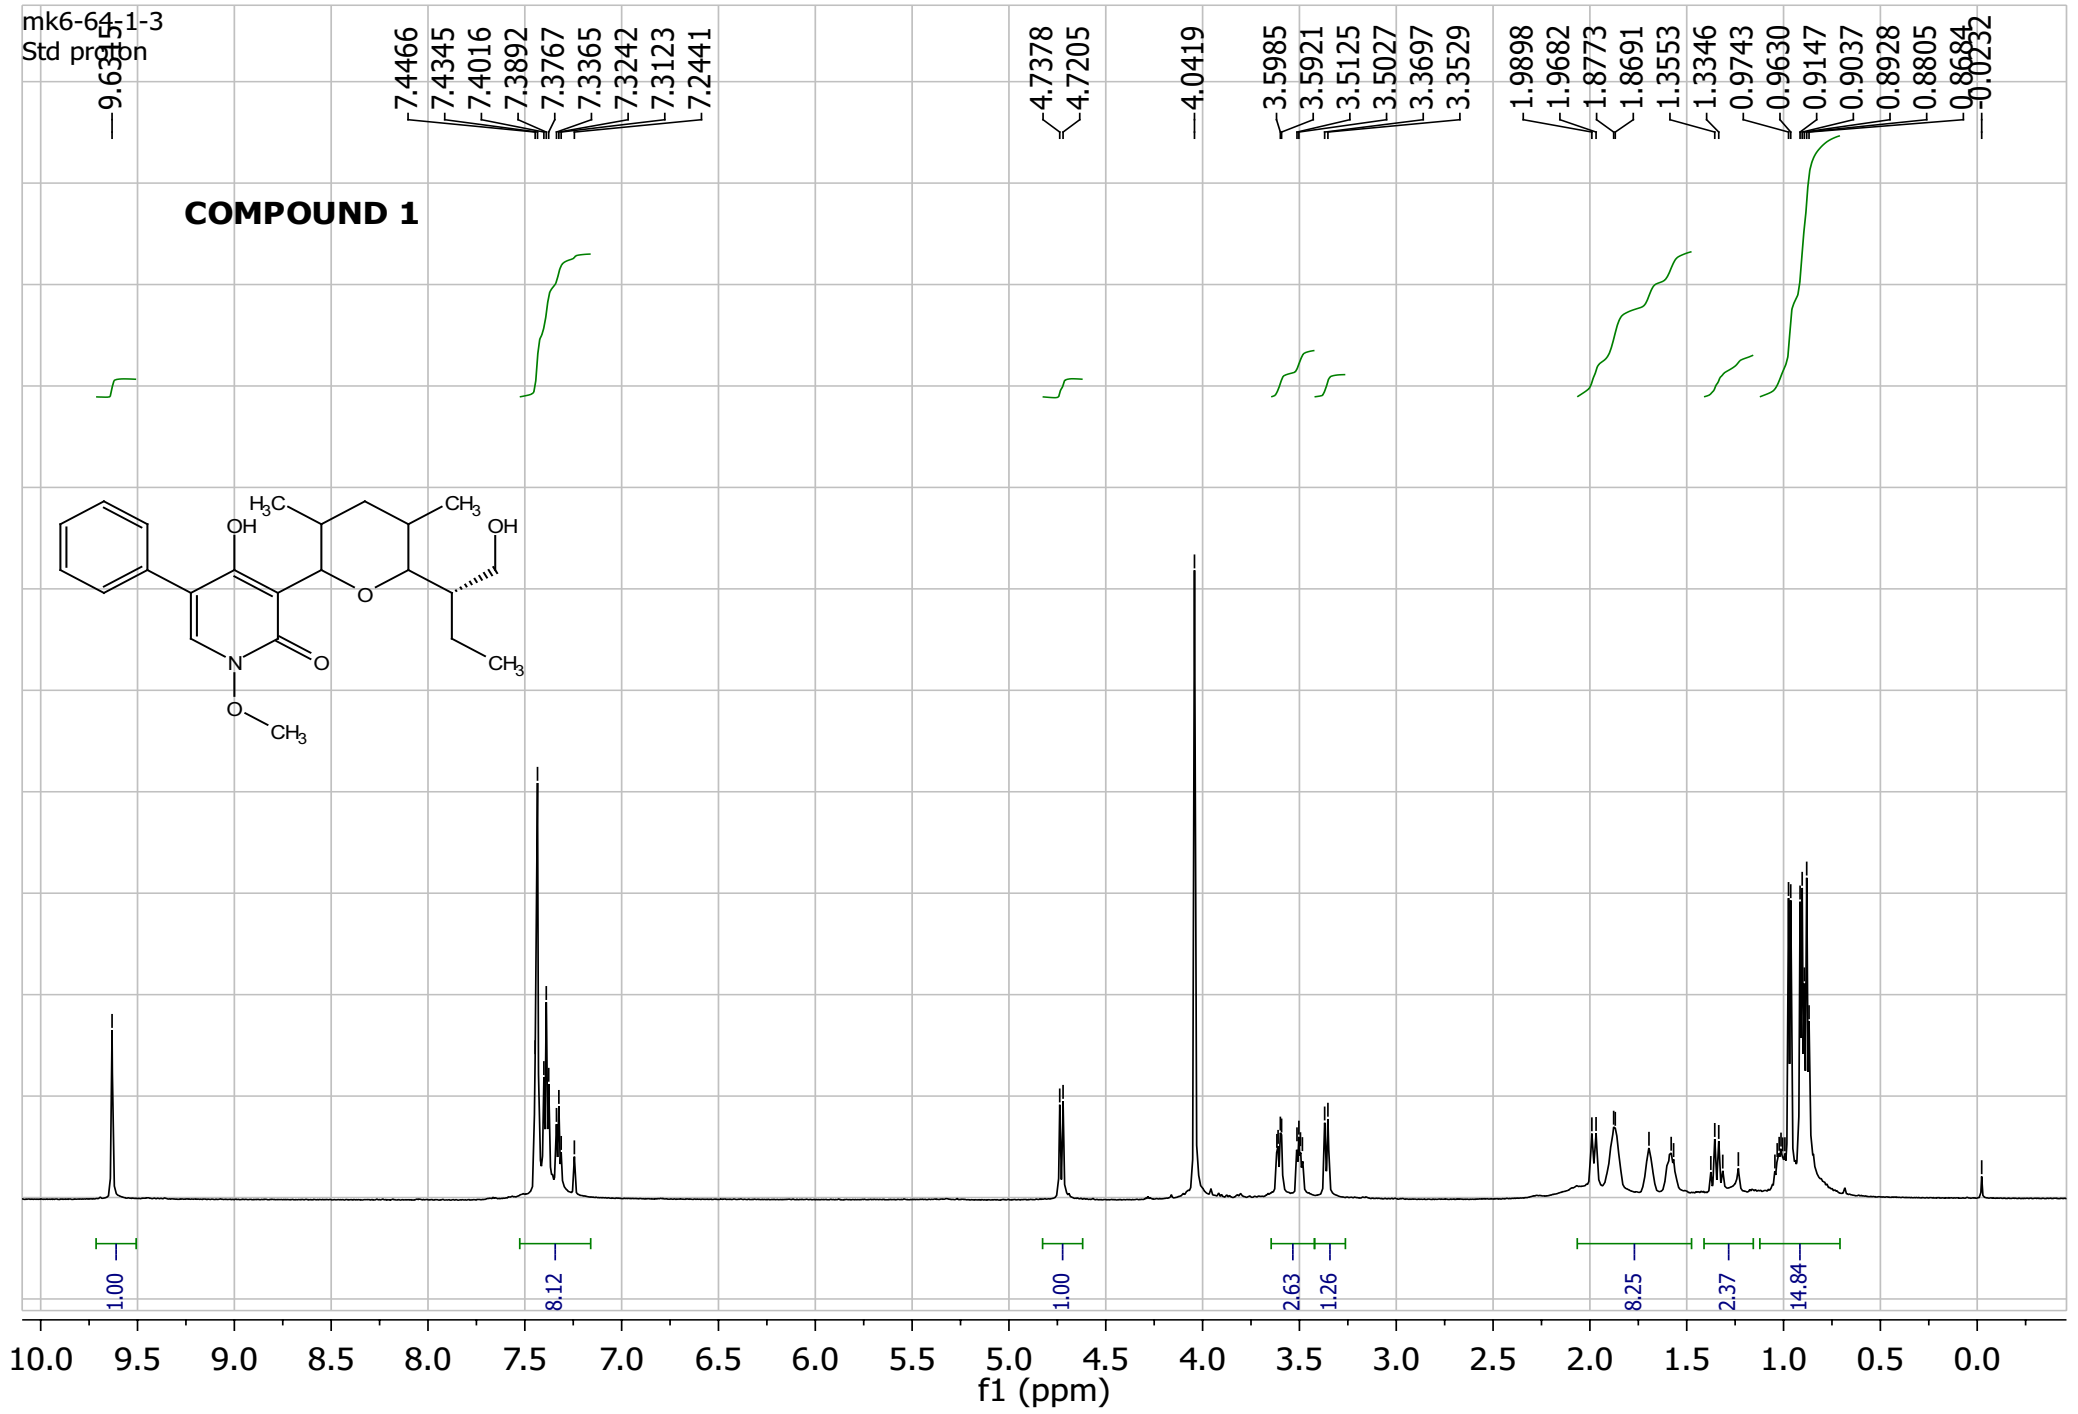

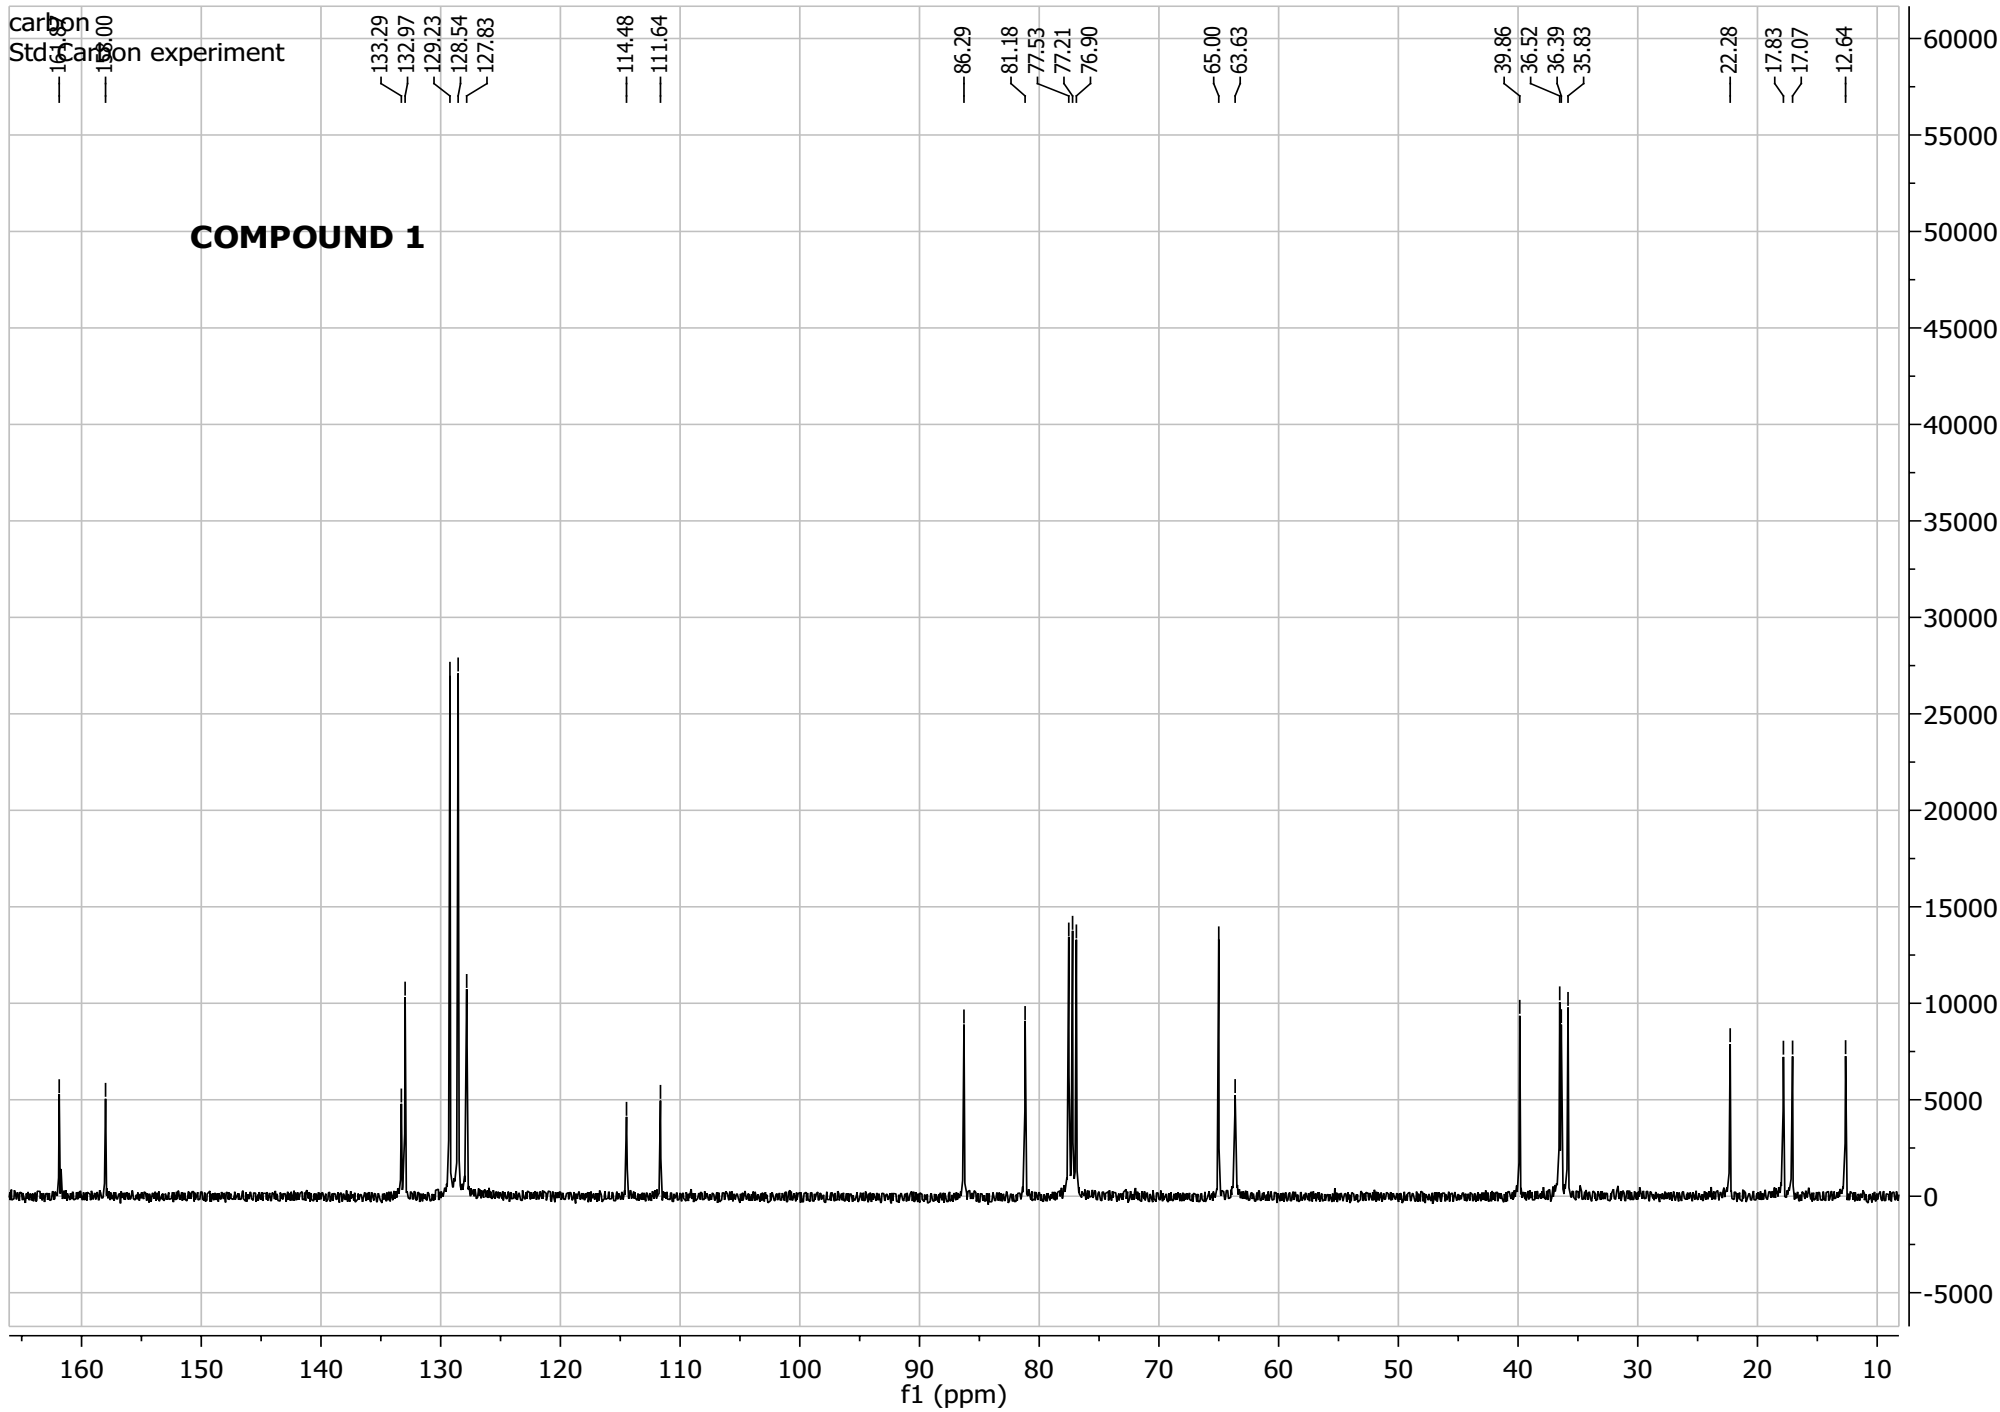

m-50-11  
S3  
proton

### COMPOUND 2

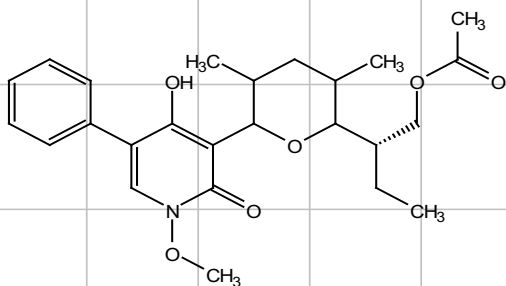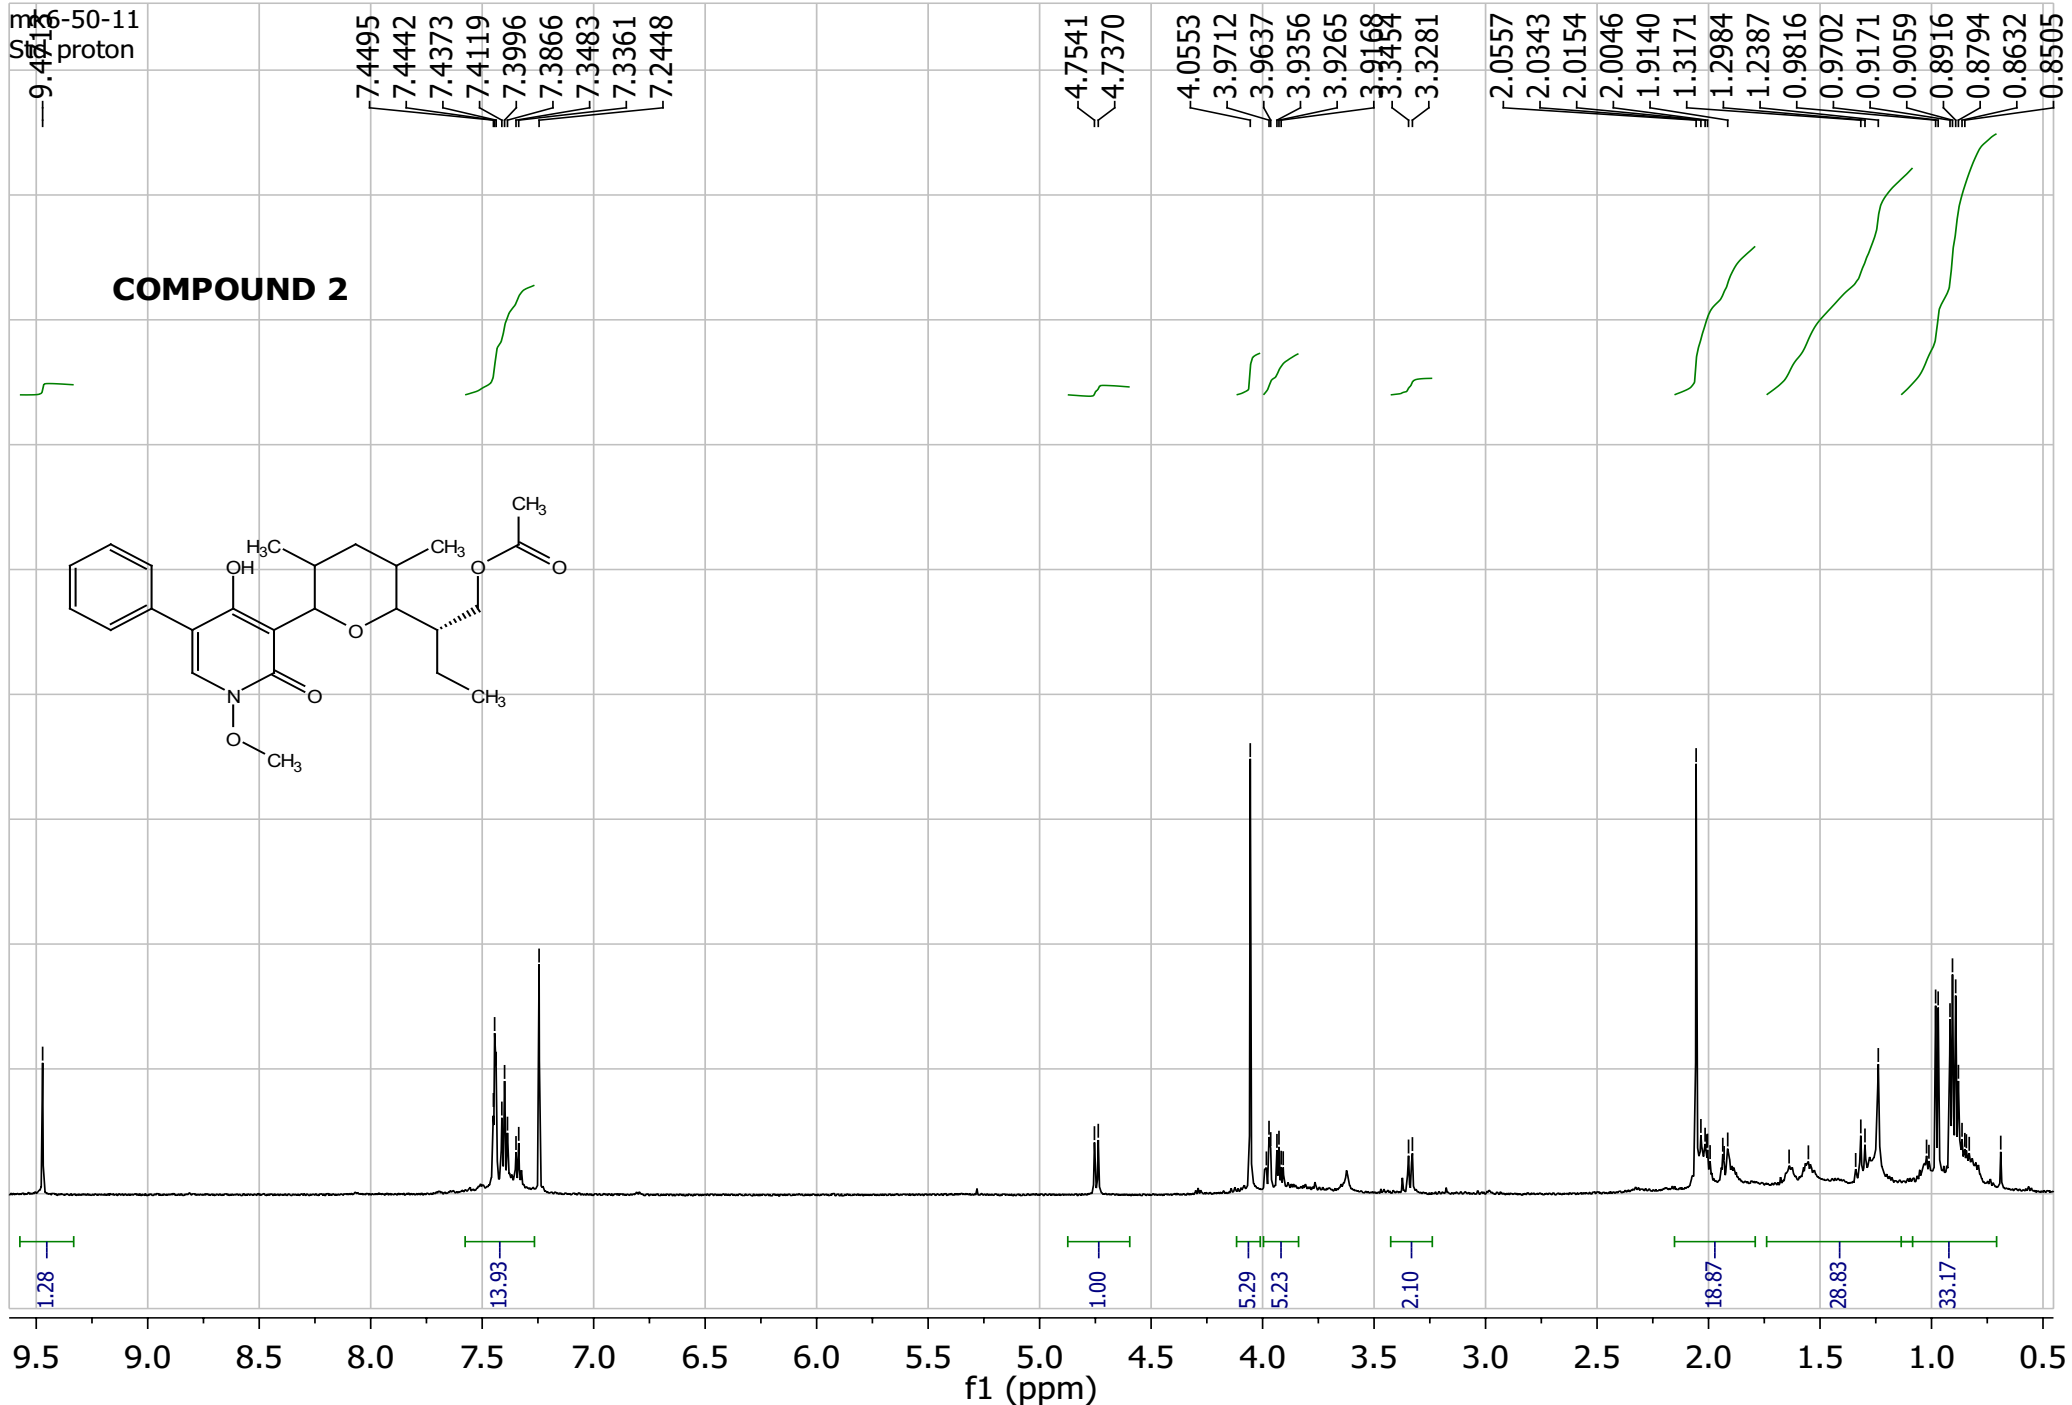

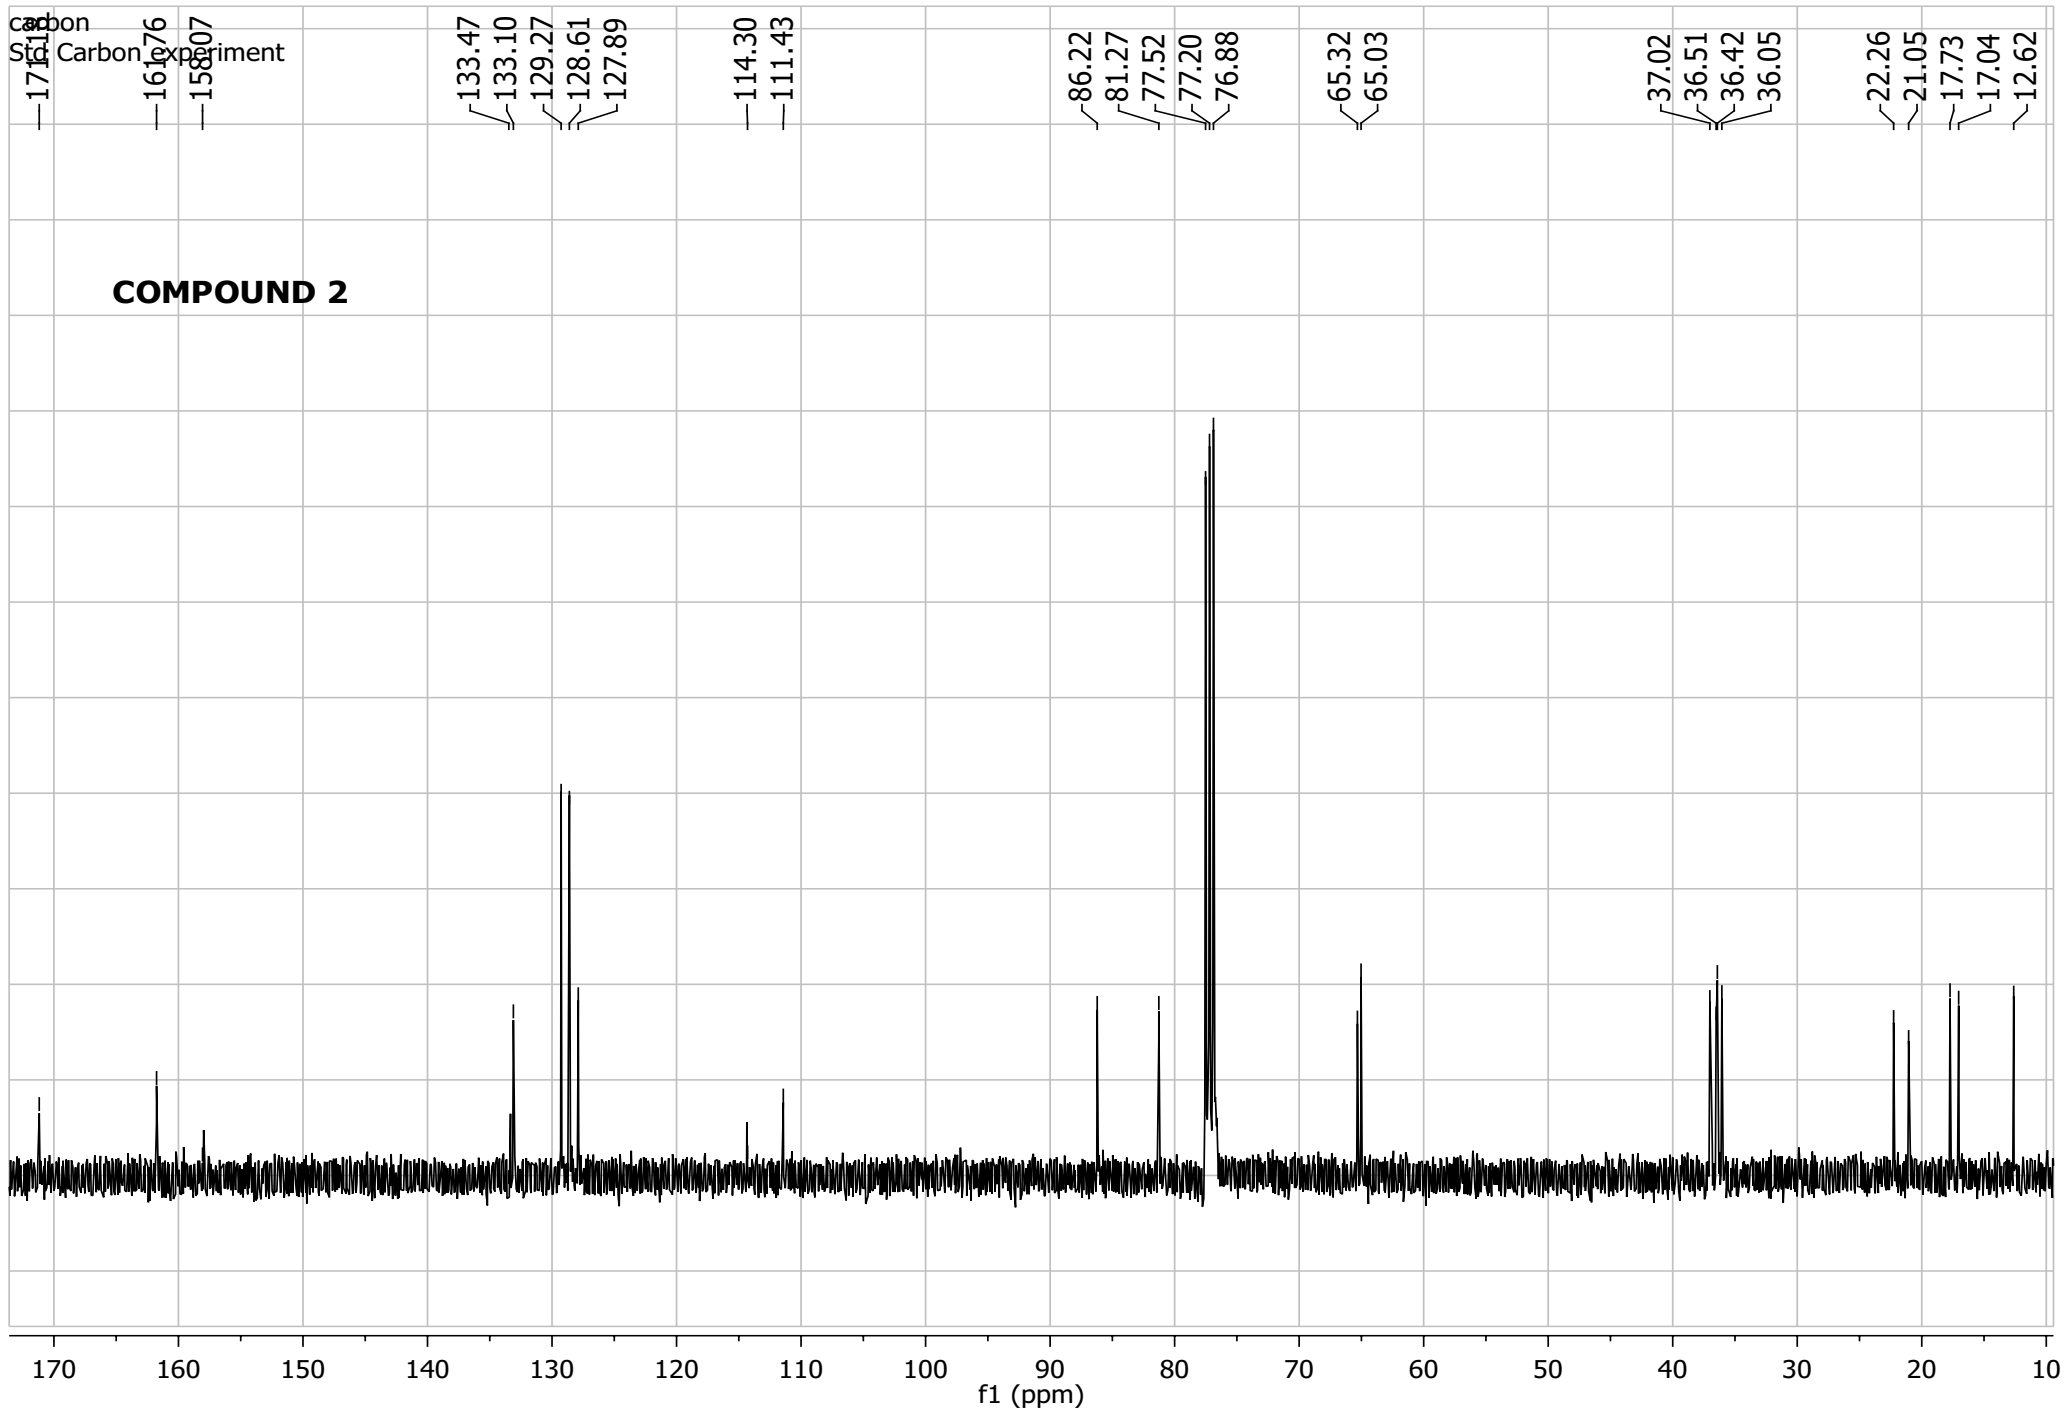

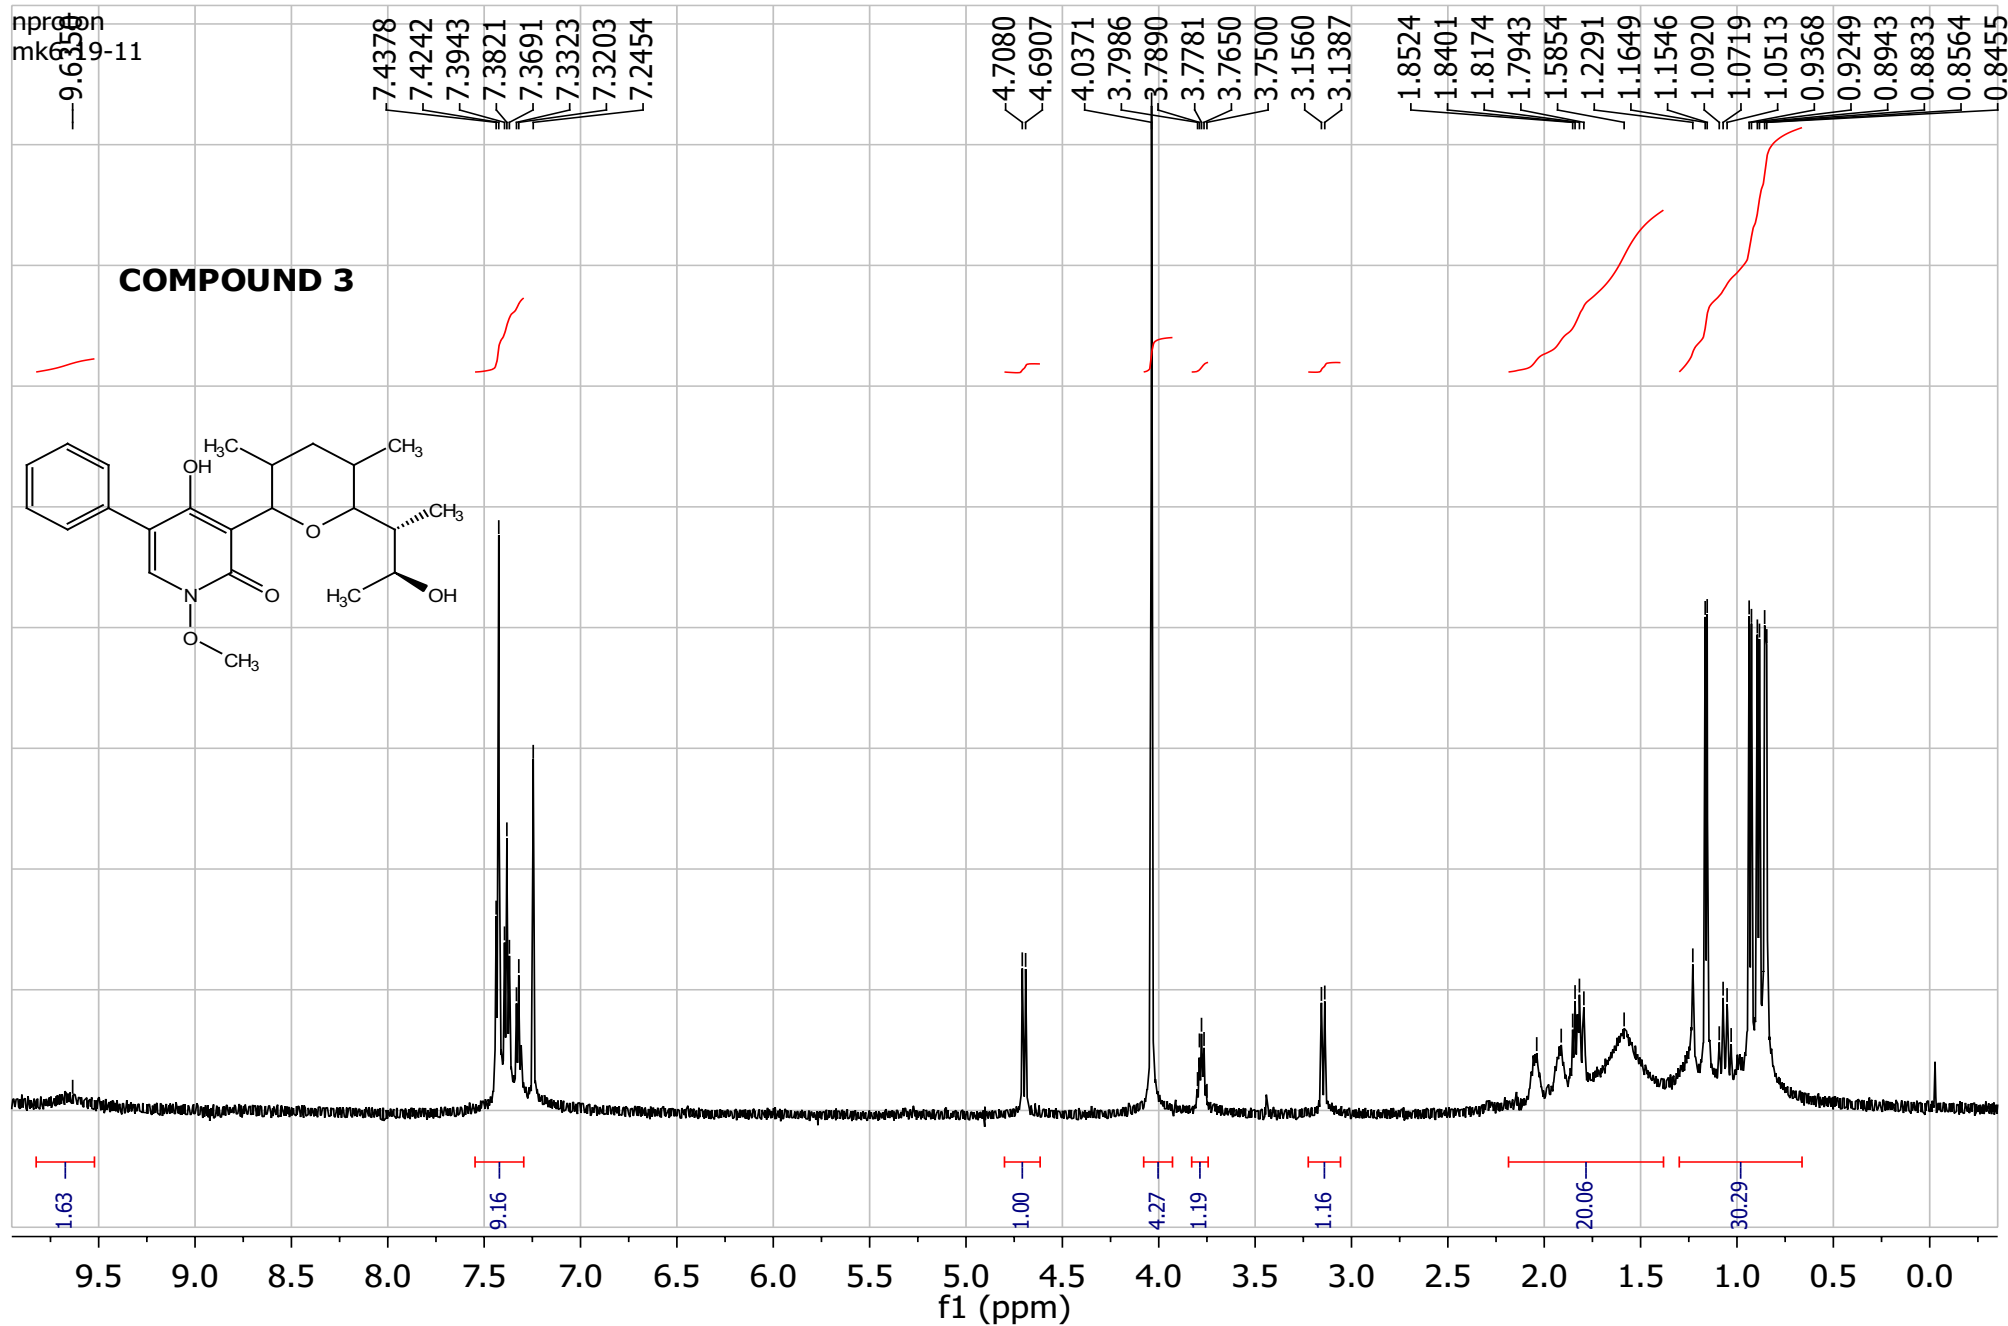

Compound 3

mk6-19-11

mk6-19-11

mk6-19-11

Archive directory: /export/home/malik/vnmr/sy/data/...  
Sample directory: /export/home/malik/vnmr/sy/data/...  
File: CARBON

Pulse Sequence: s2pu1

Solvent: CDCl3

Ambient temperature

Mercury-49055 "unknown"

Relax. delay 1.000 sec  
Pulse 45.0 degrees  
Acq. time 1.199 sec  
Width 25125.6 Hz  
959 repetitions  
OBSERVE C13, 180.6115557 MHz  
DECOUPLE H1, 498.1272240 MHz  
Power 36 dB  
continuously on  
WALTZ-16 modulated  
DATA PROCESSING  
Line broadening 1.0 Hz  
FT size 65536  
Total time 3 hr, 10 min, 49 sec

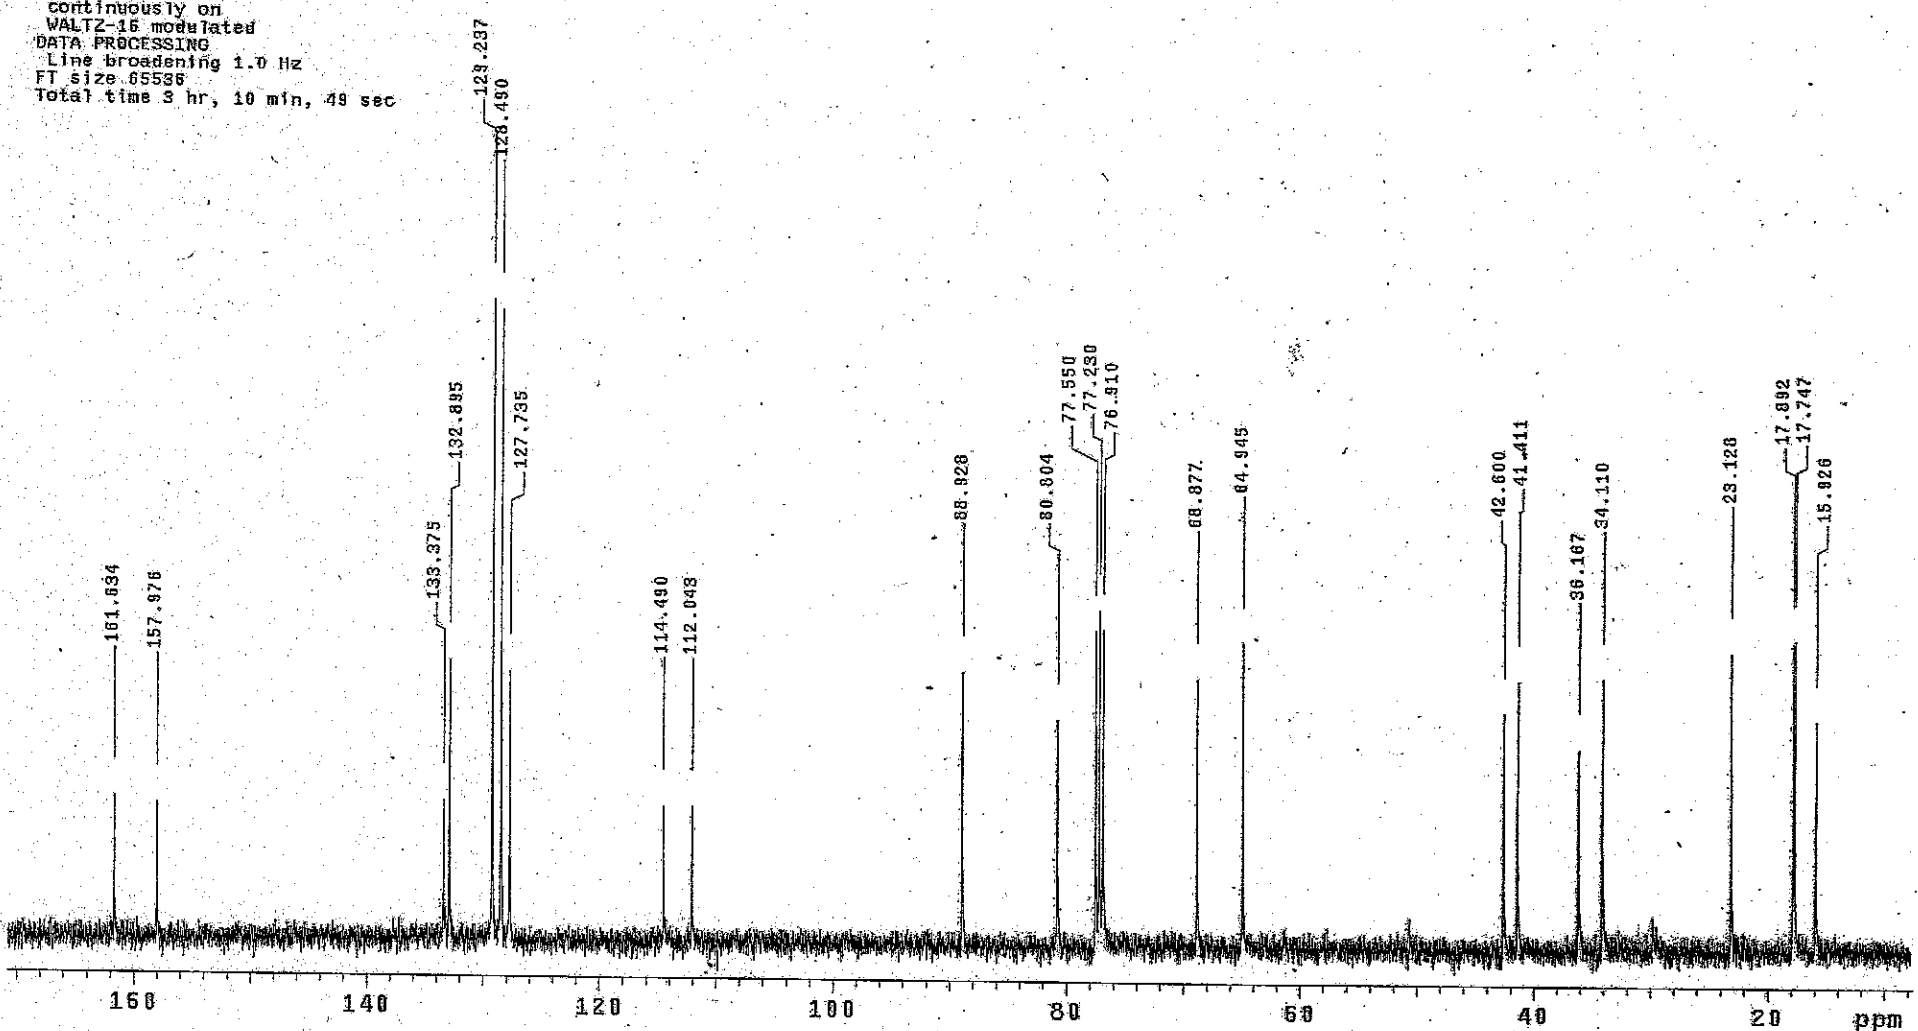



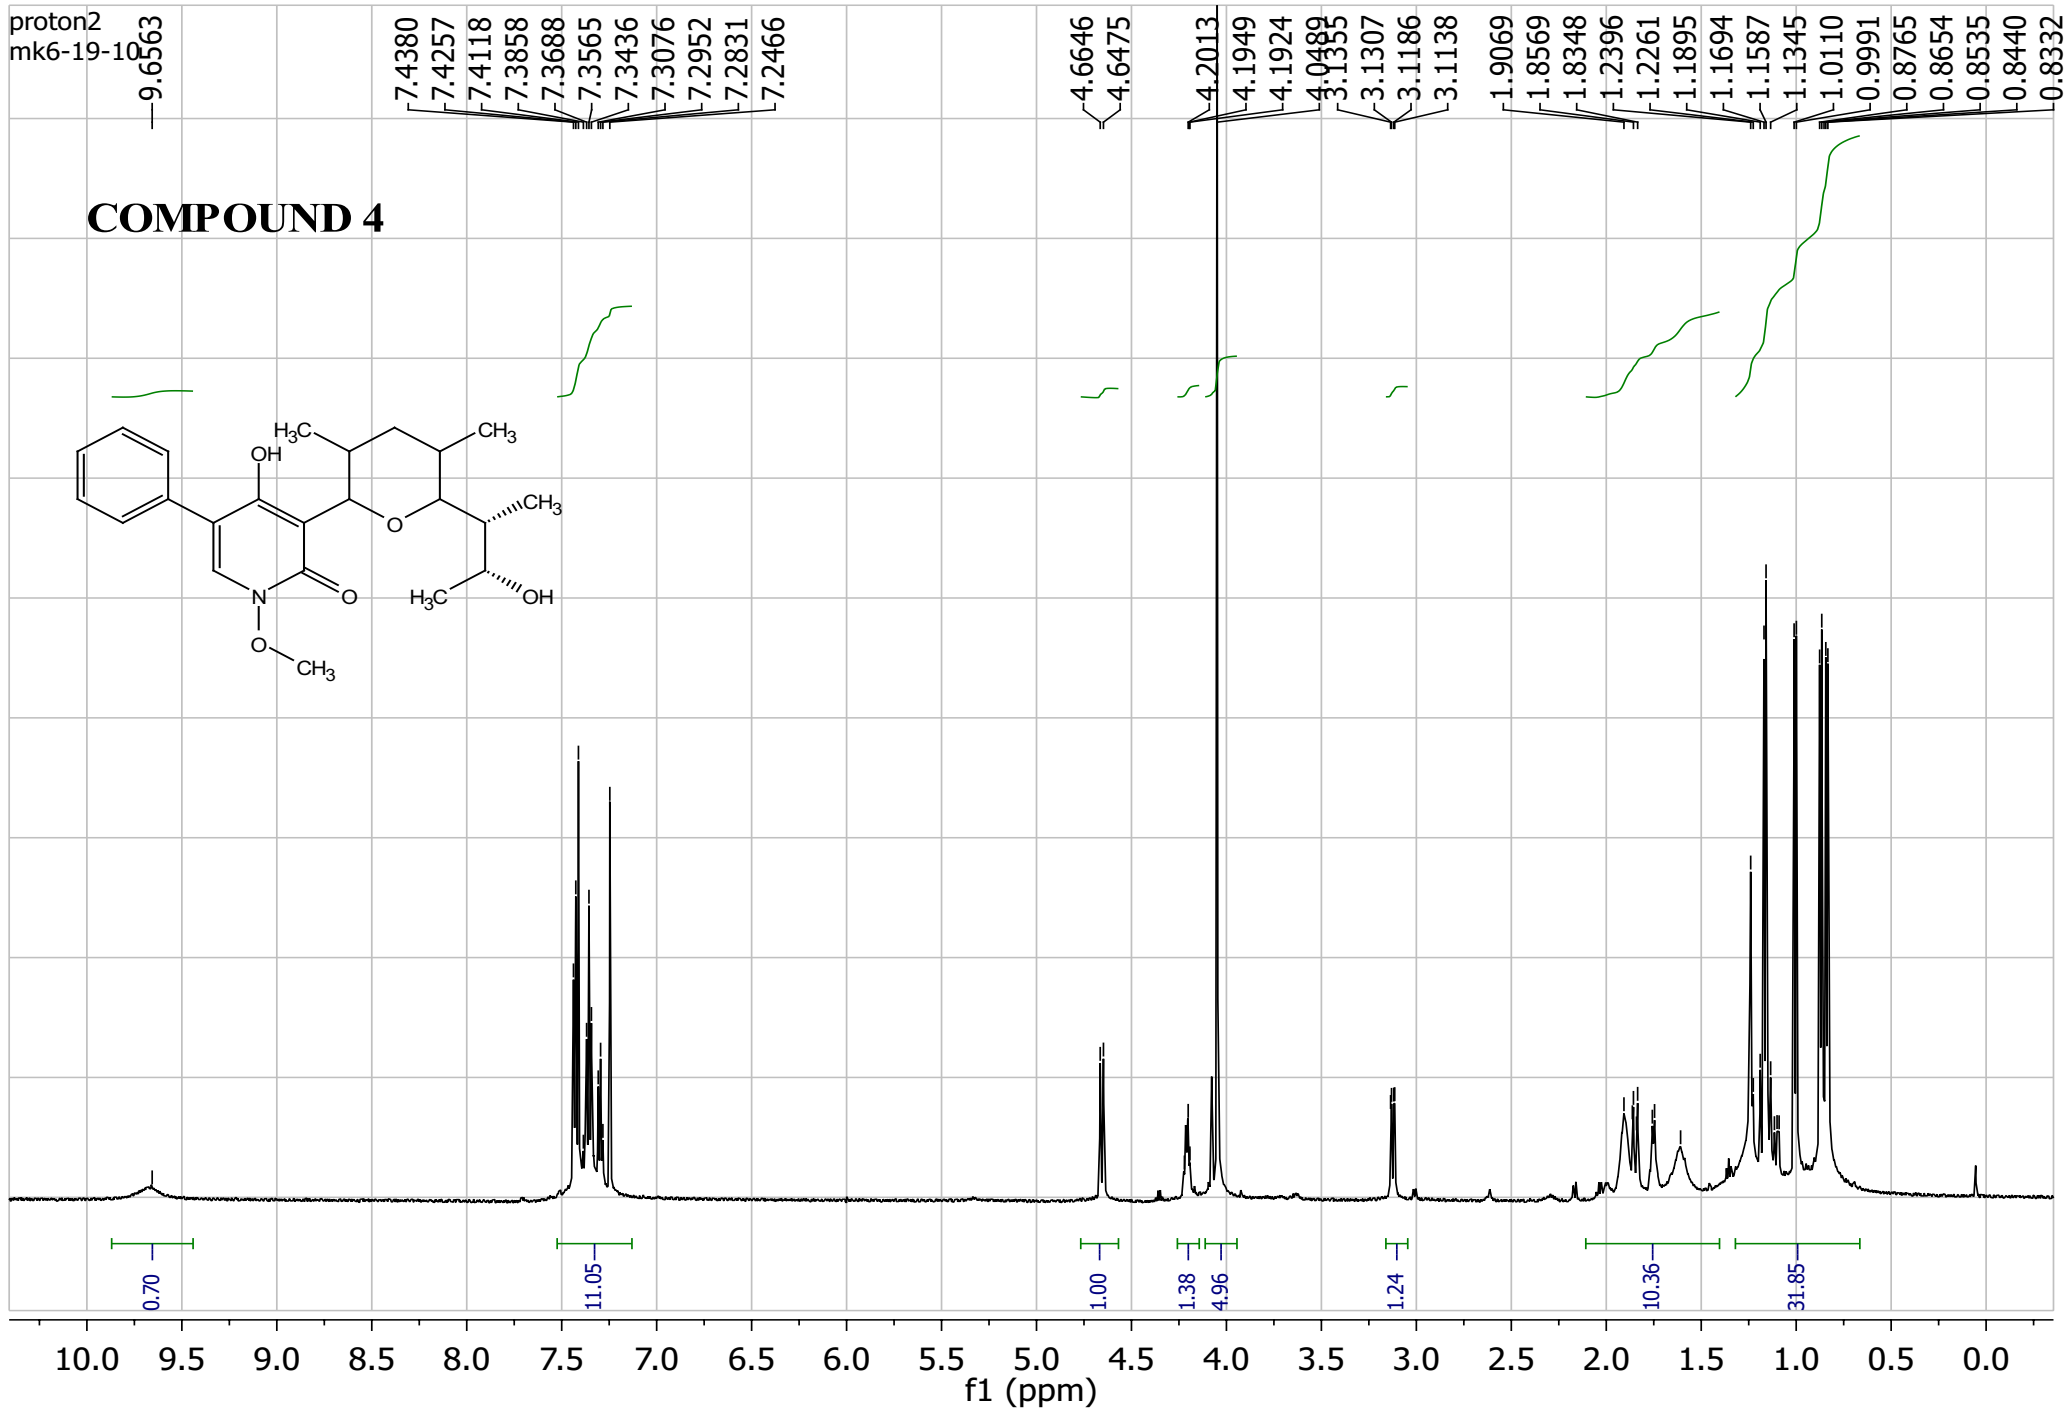

Compound 4

1  
mk6-19-10

Archive directory: /export/home/mallik/vnmr/sys/data  
Sample directory:

Pulse Sequence: s2pul  
Solvent: CDCl3  
Ambient temperature  
File: carbon  
Mercury-400BB "unknown"

Relax. delay 1.000 sec  
Pulse 45.0 degrees  
Acq. time 1.199 sec  
Width 25125.6 Hz  
2023 repetitions  
OBSERVE C13, 100.6115410 MHz  
DECOUPLE H1, 400.1272240 MHz  
Power 36 dB  
continuously on  
WALTZ-16 modulated  
DATA PROCESSING  
Line broadening 1.0 Hz  
FT size 65536  
Total time 3 hr, 10 min, 49 sec

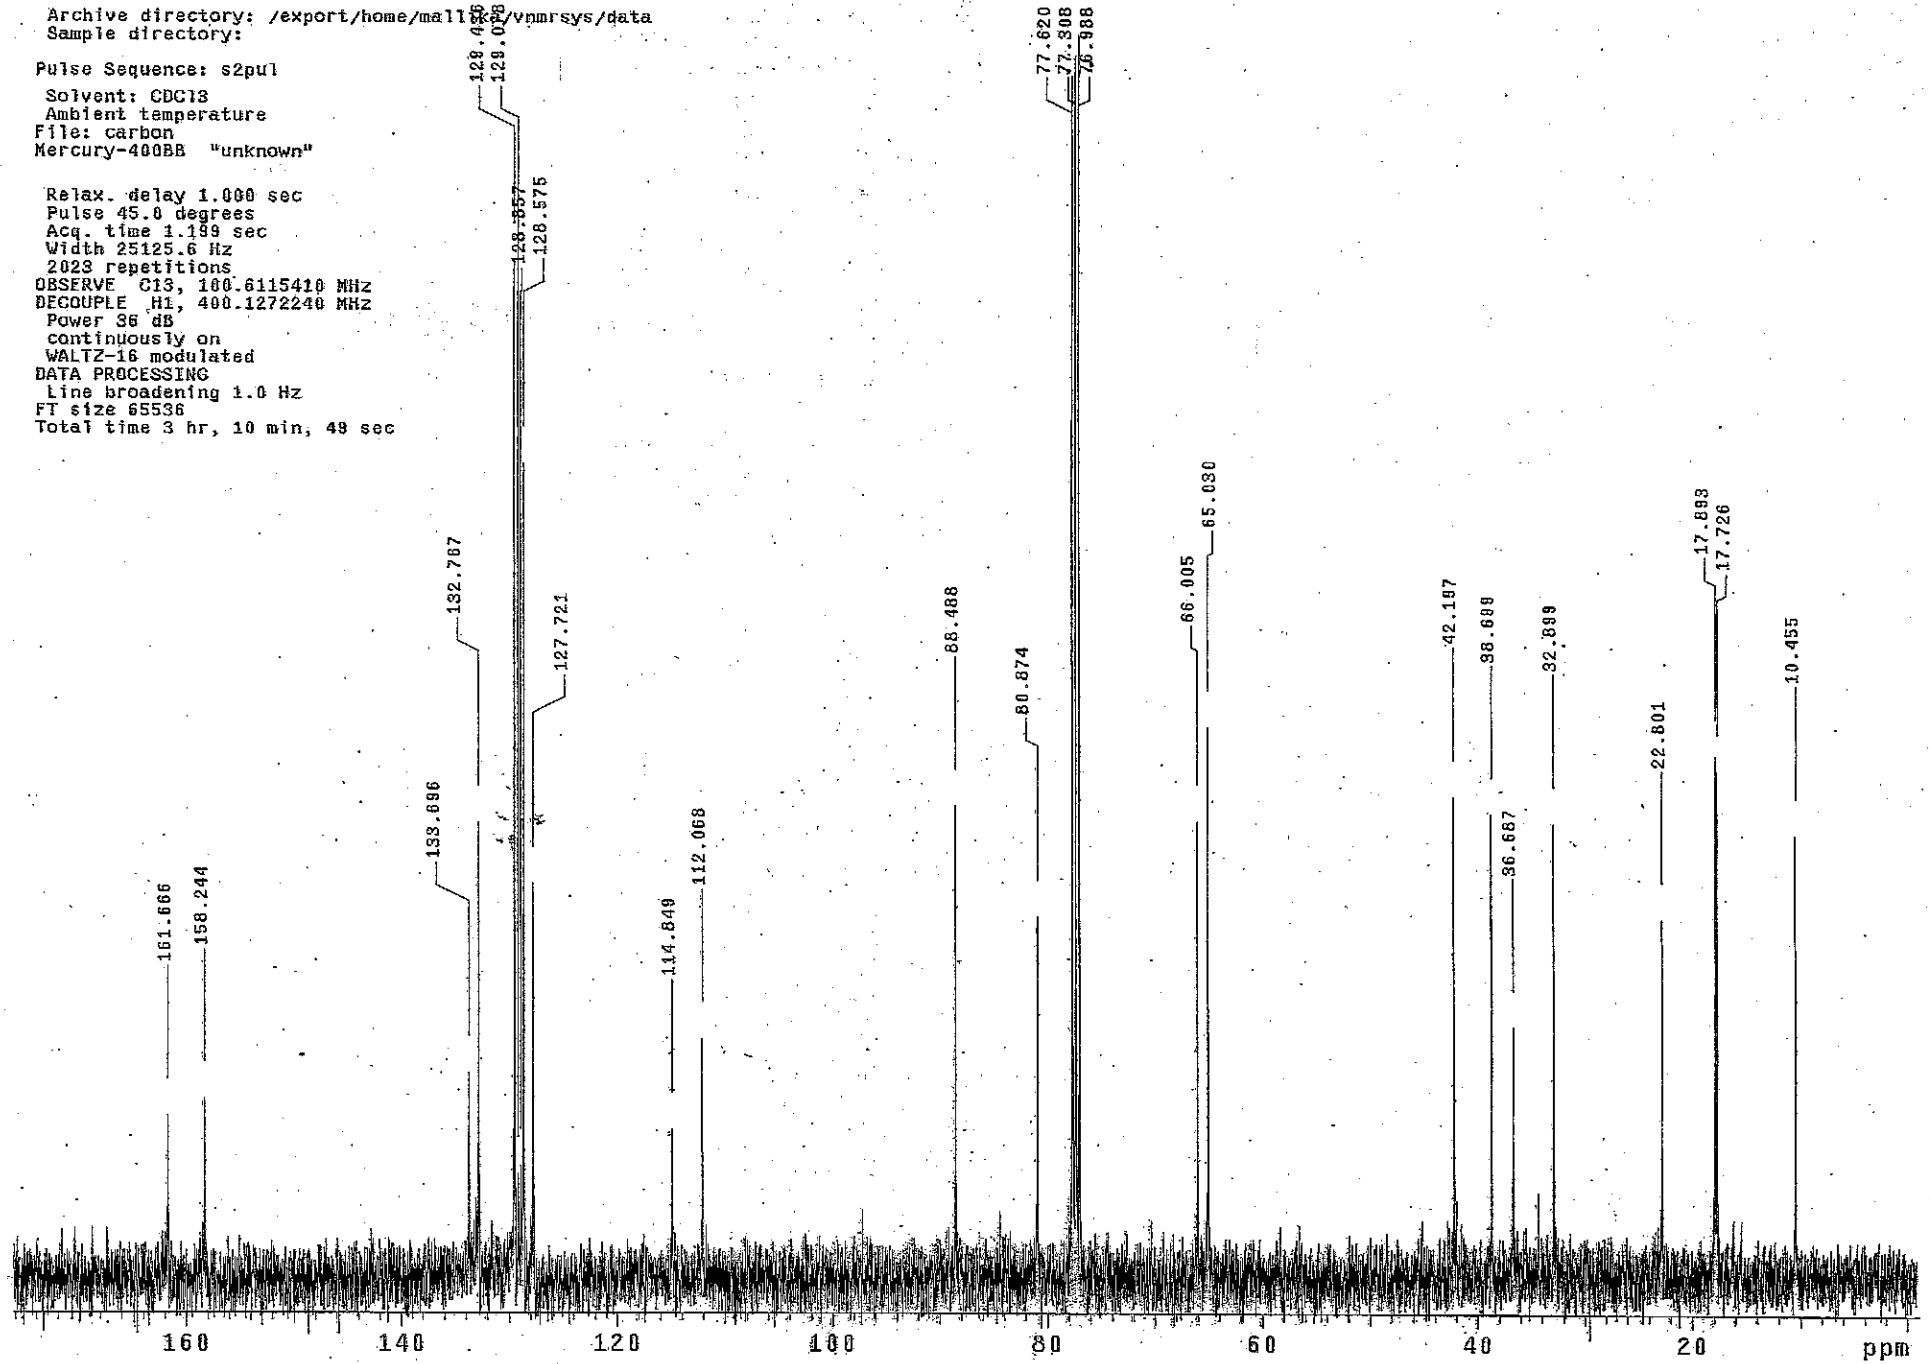

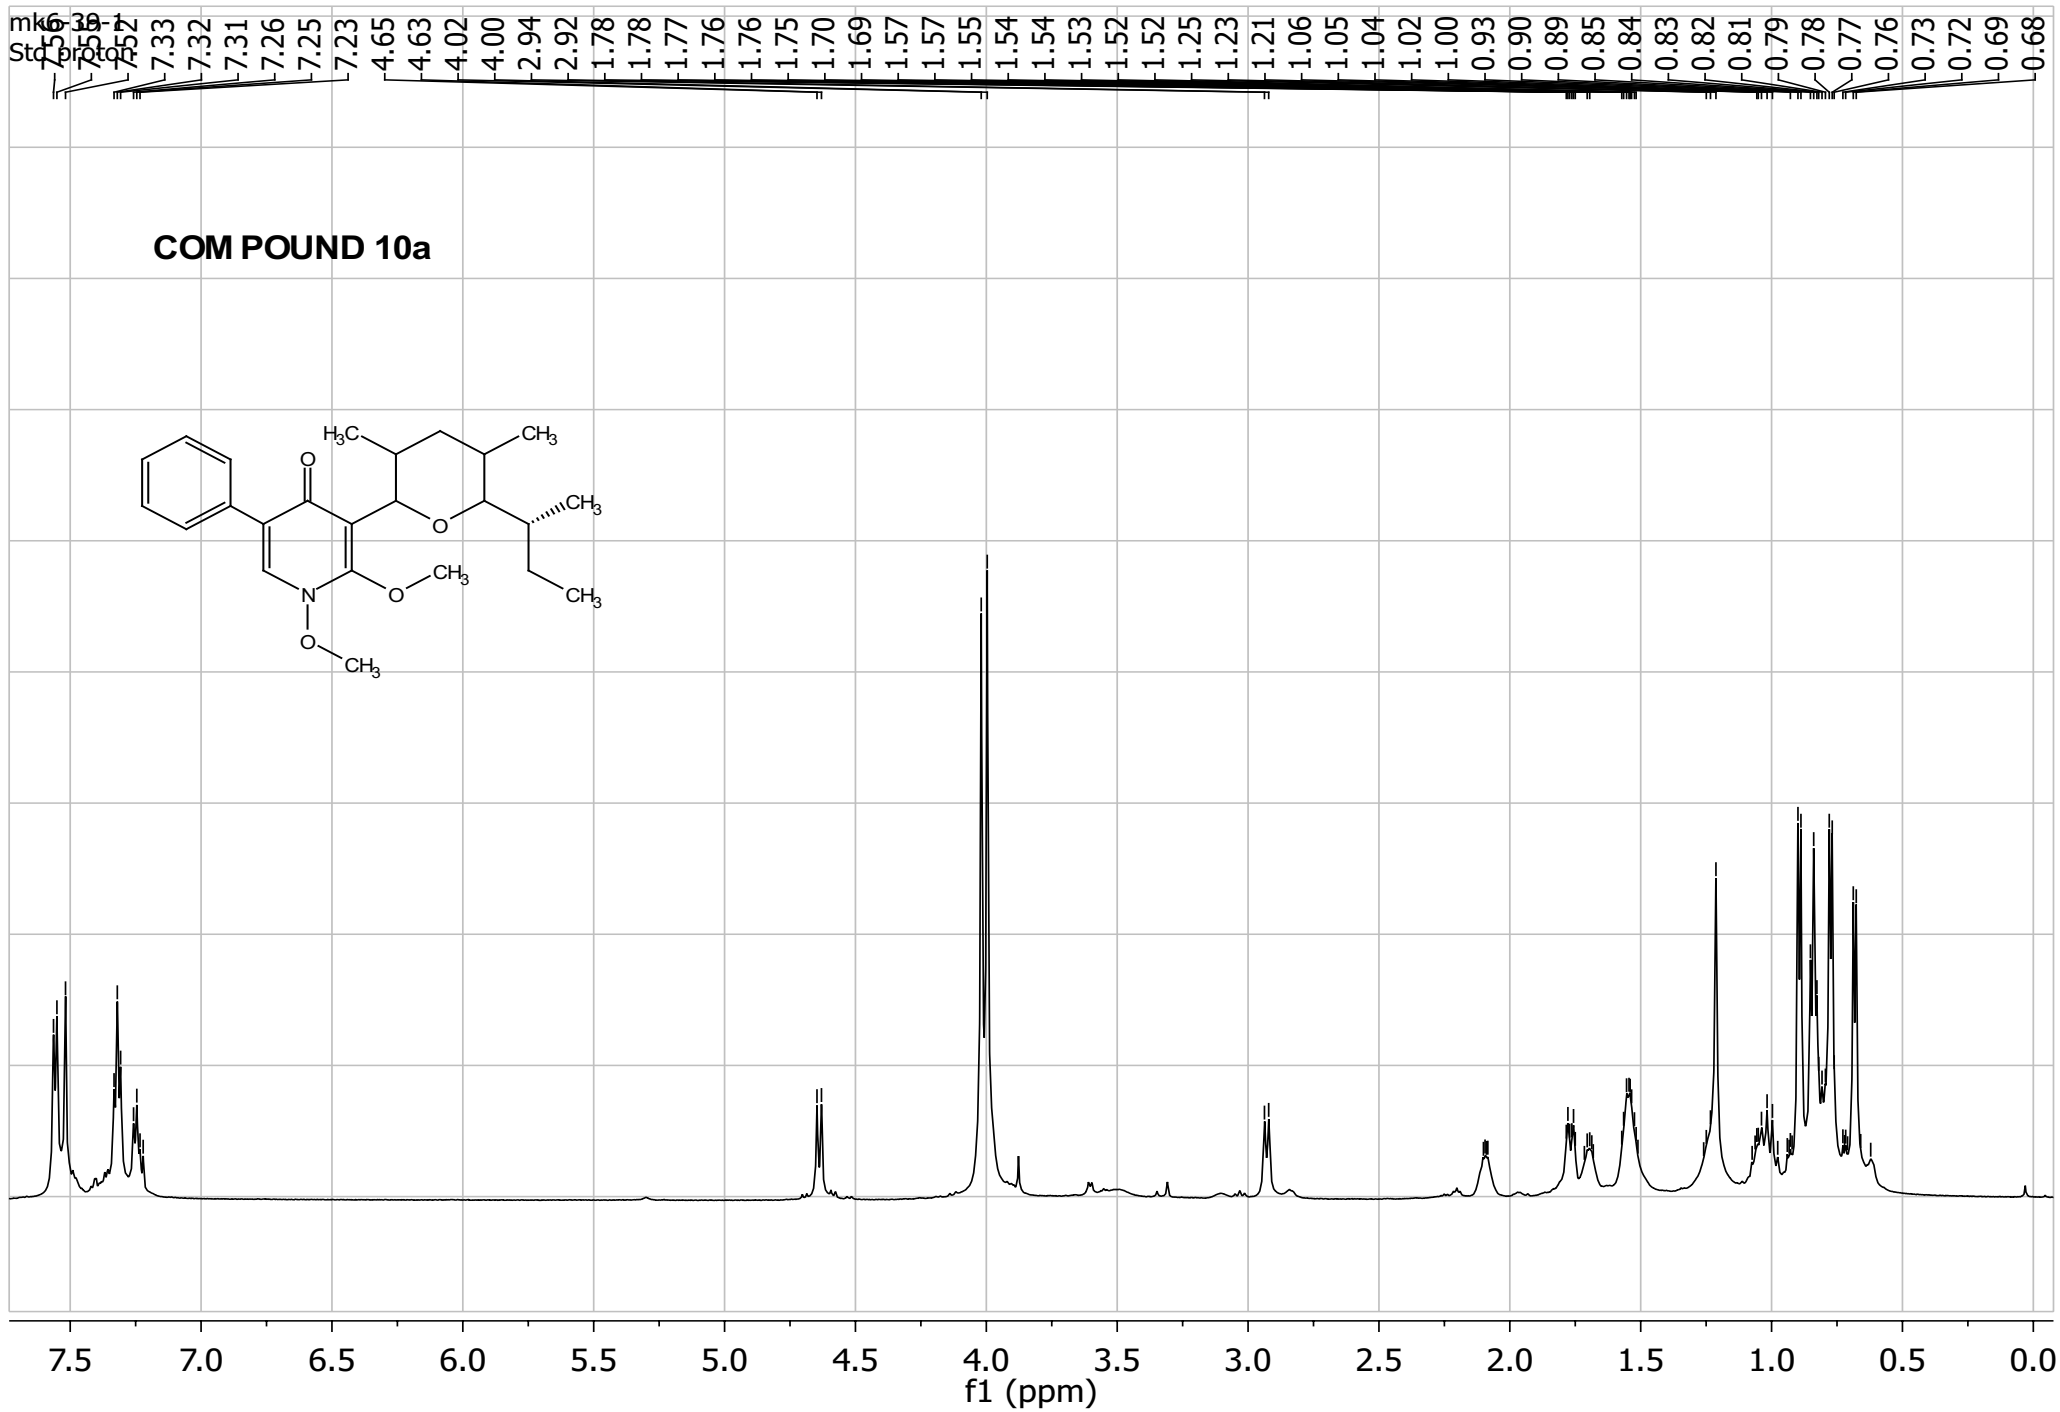

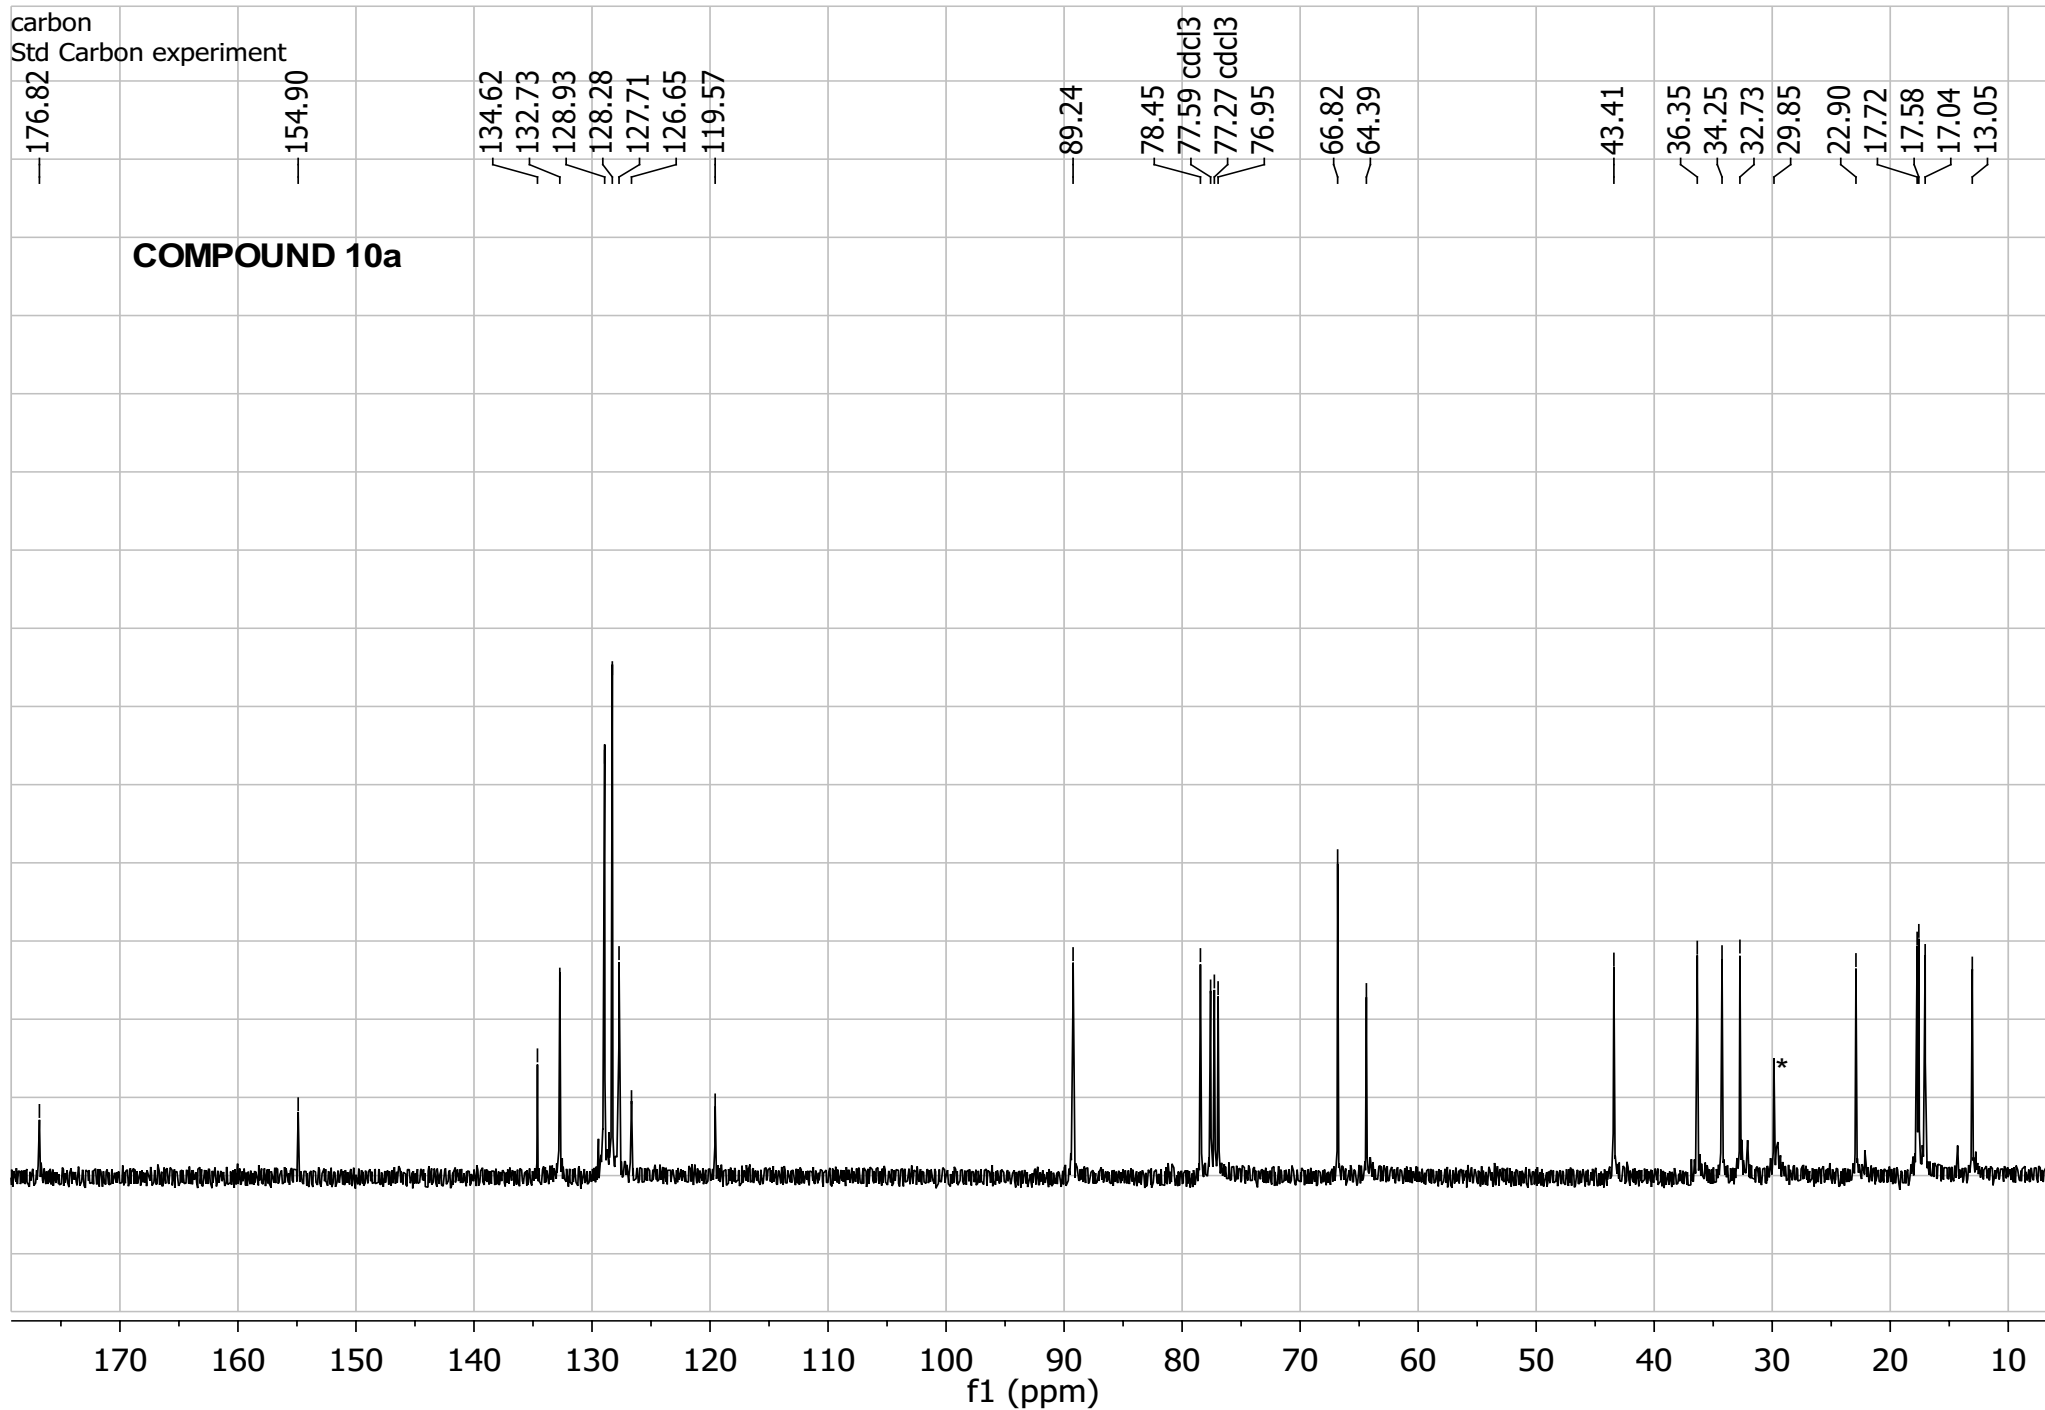

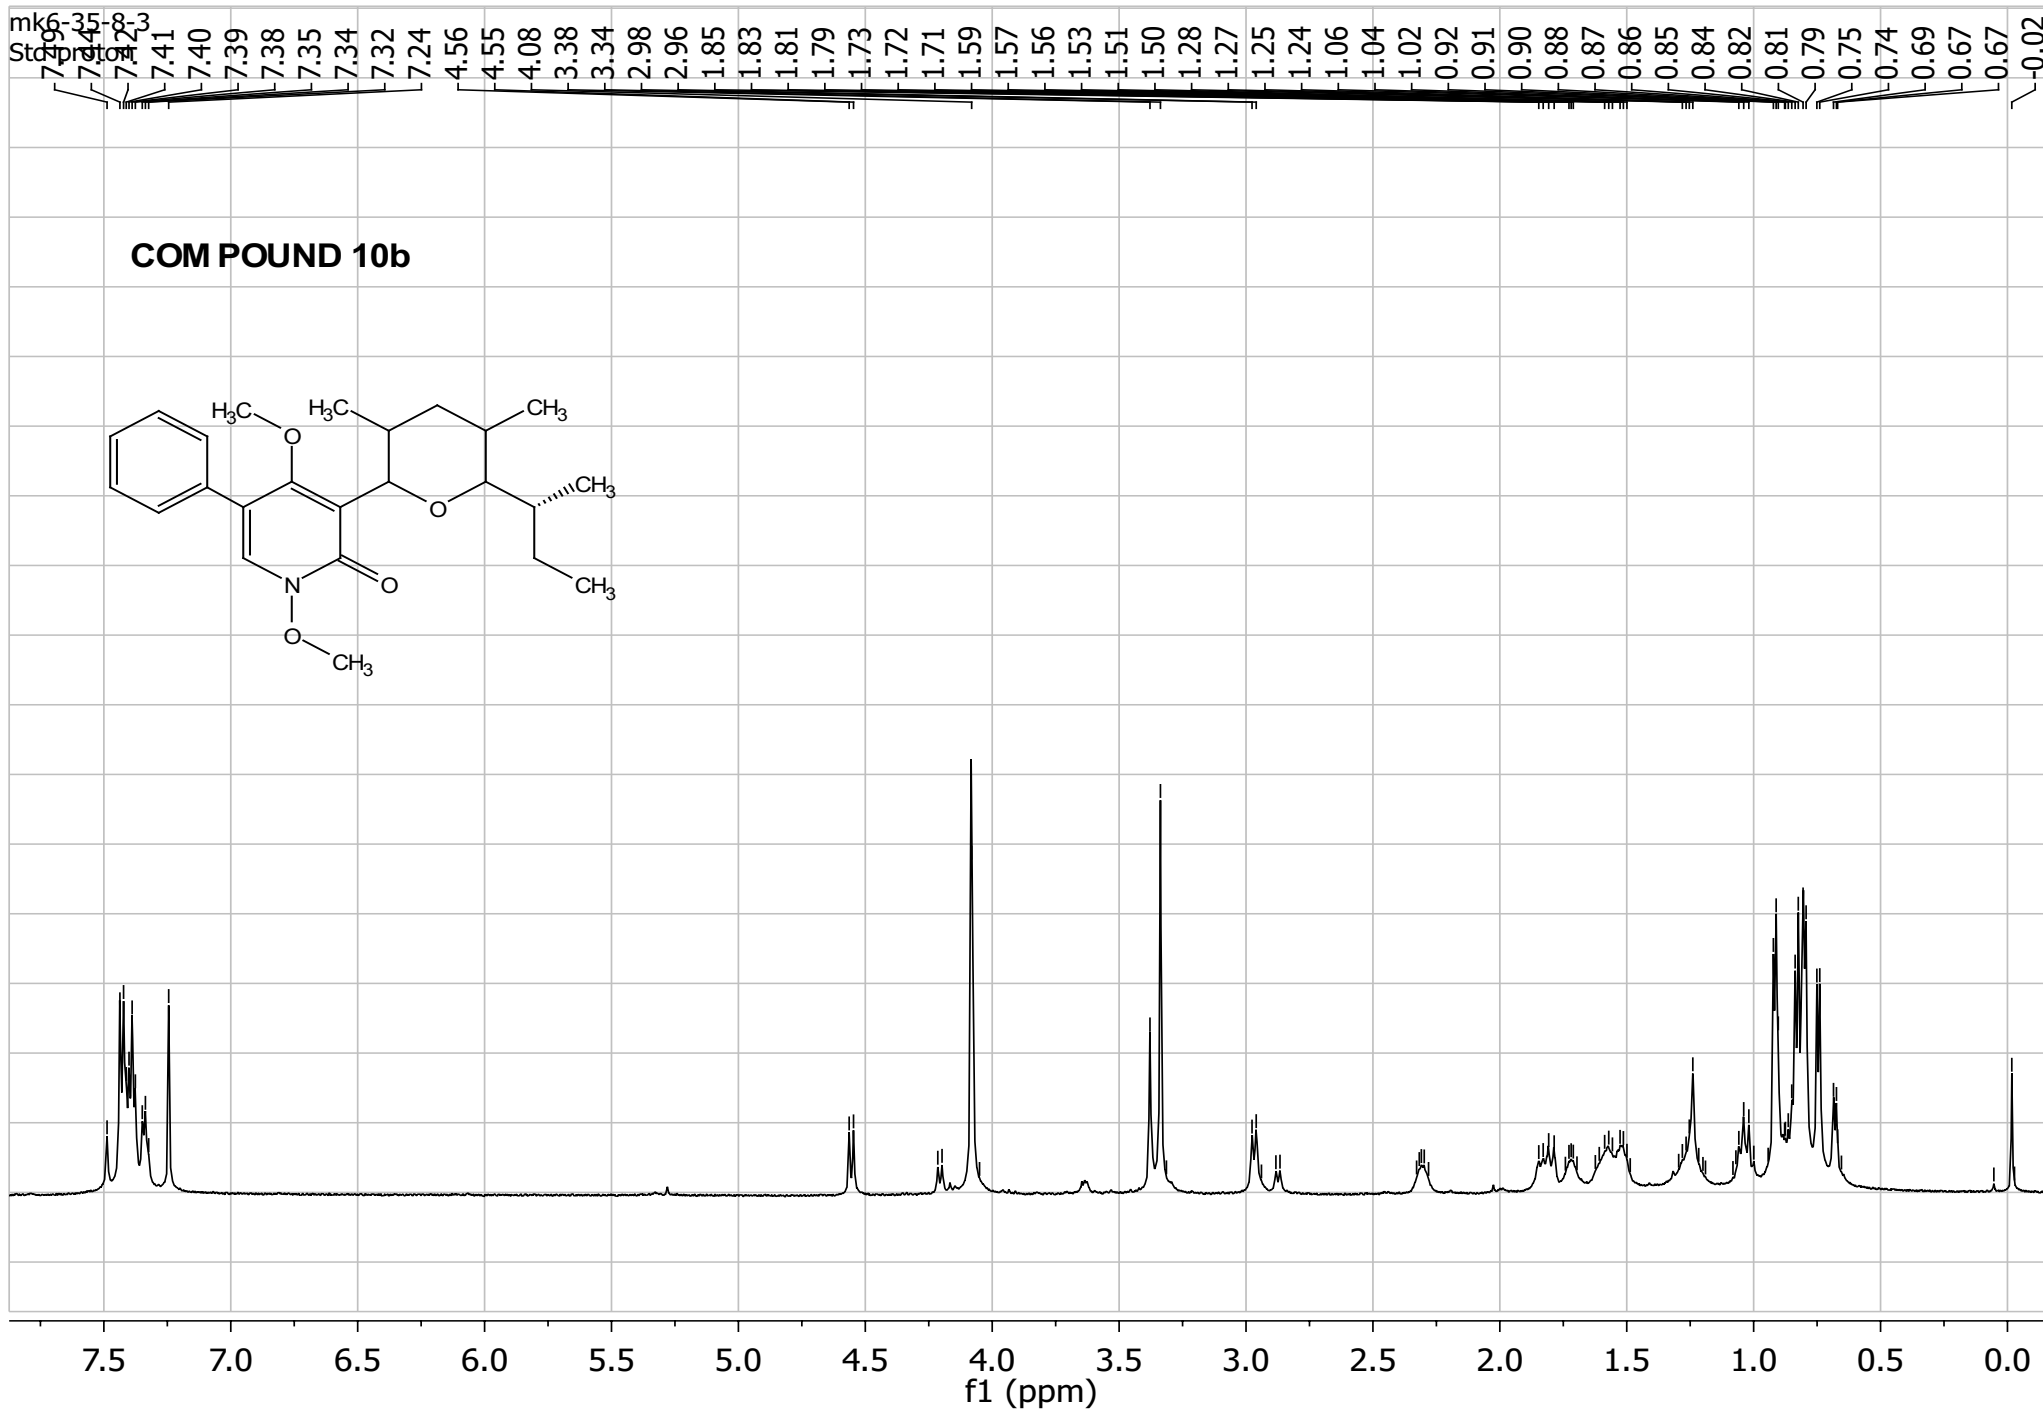

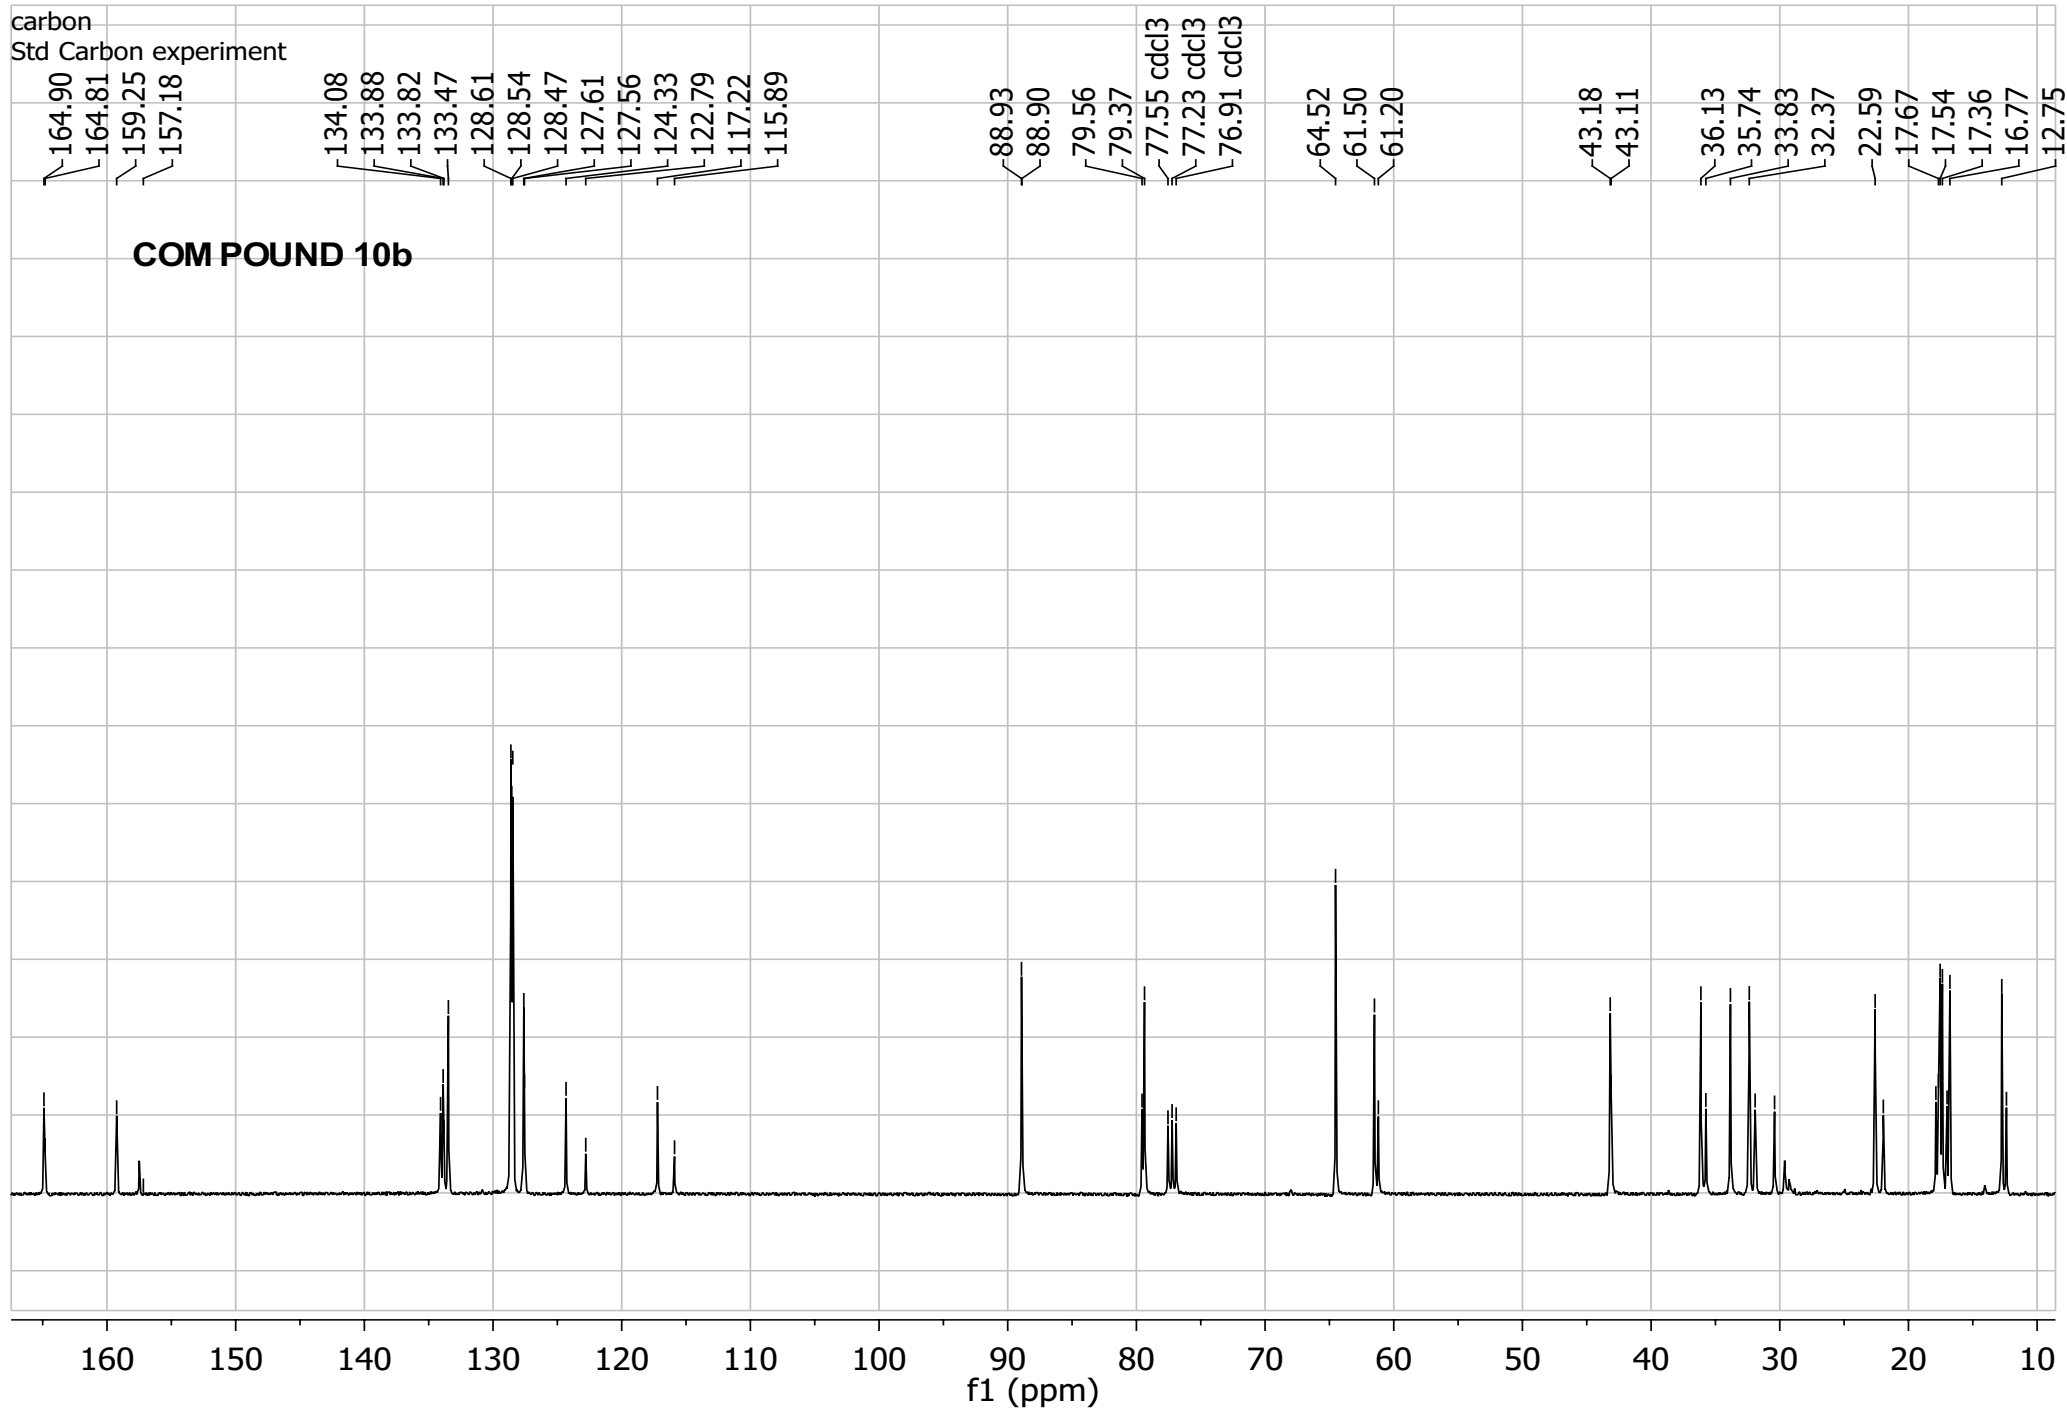

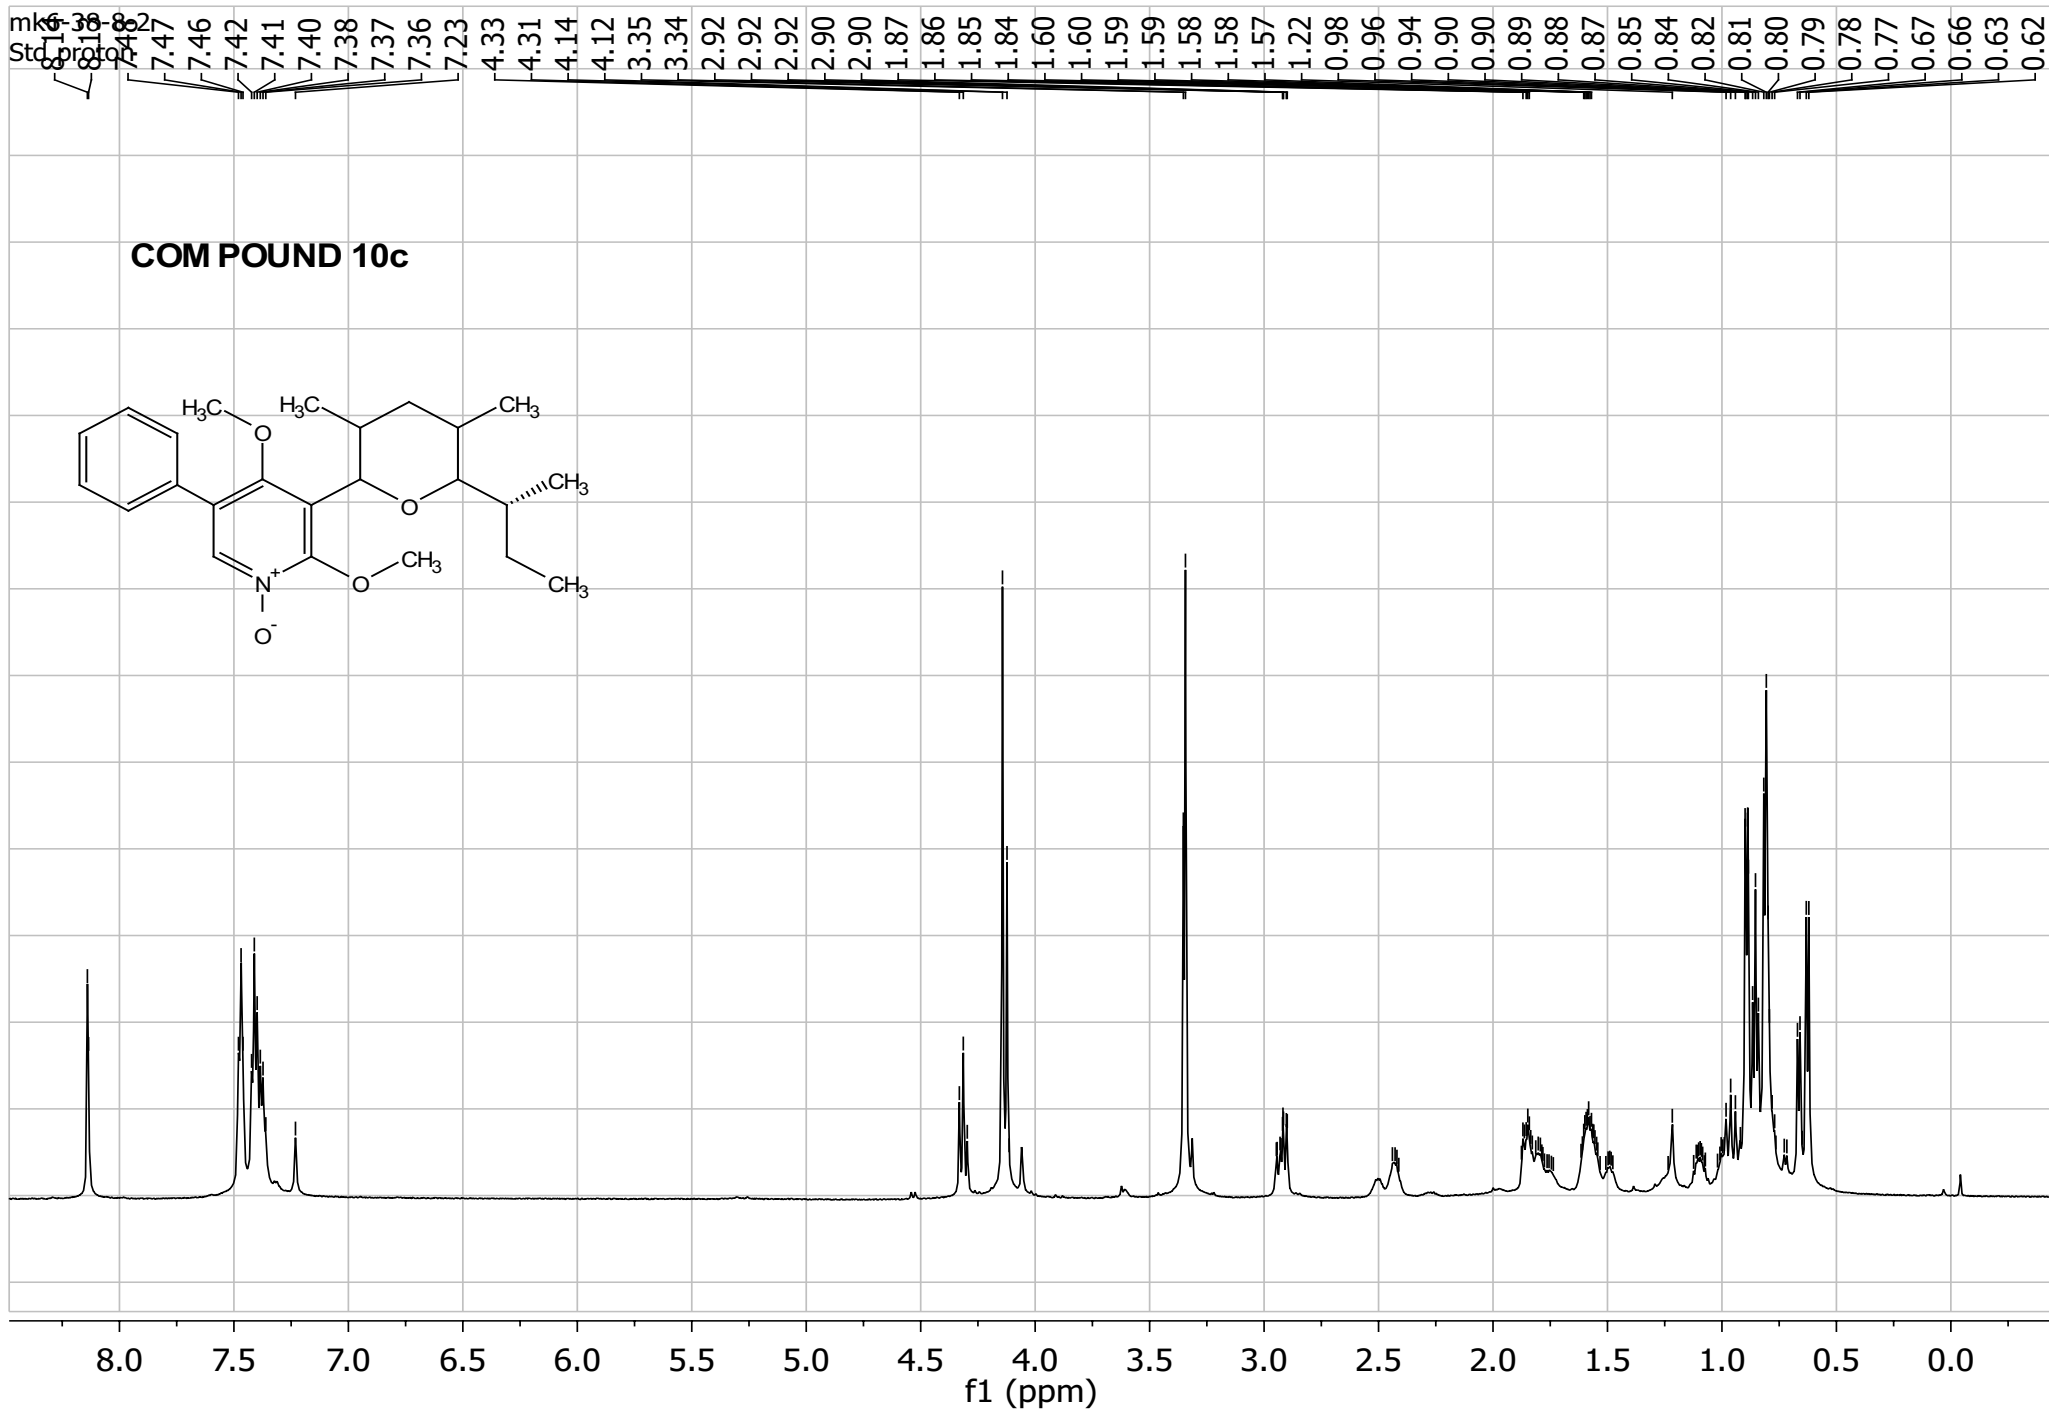

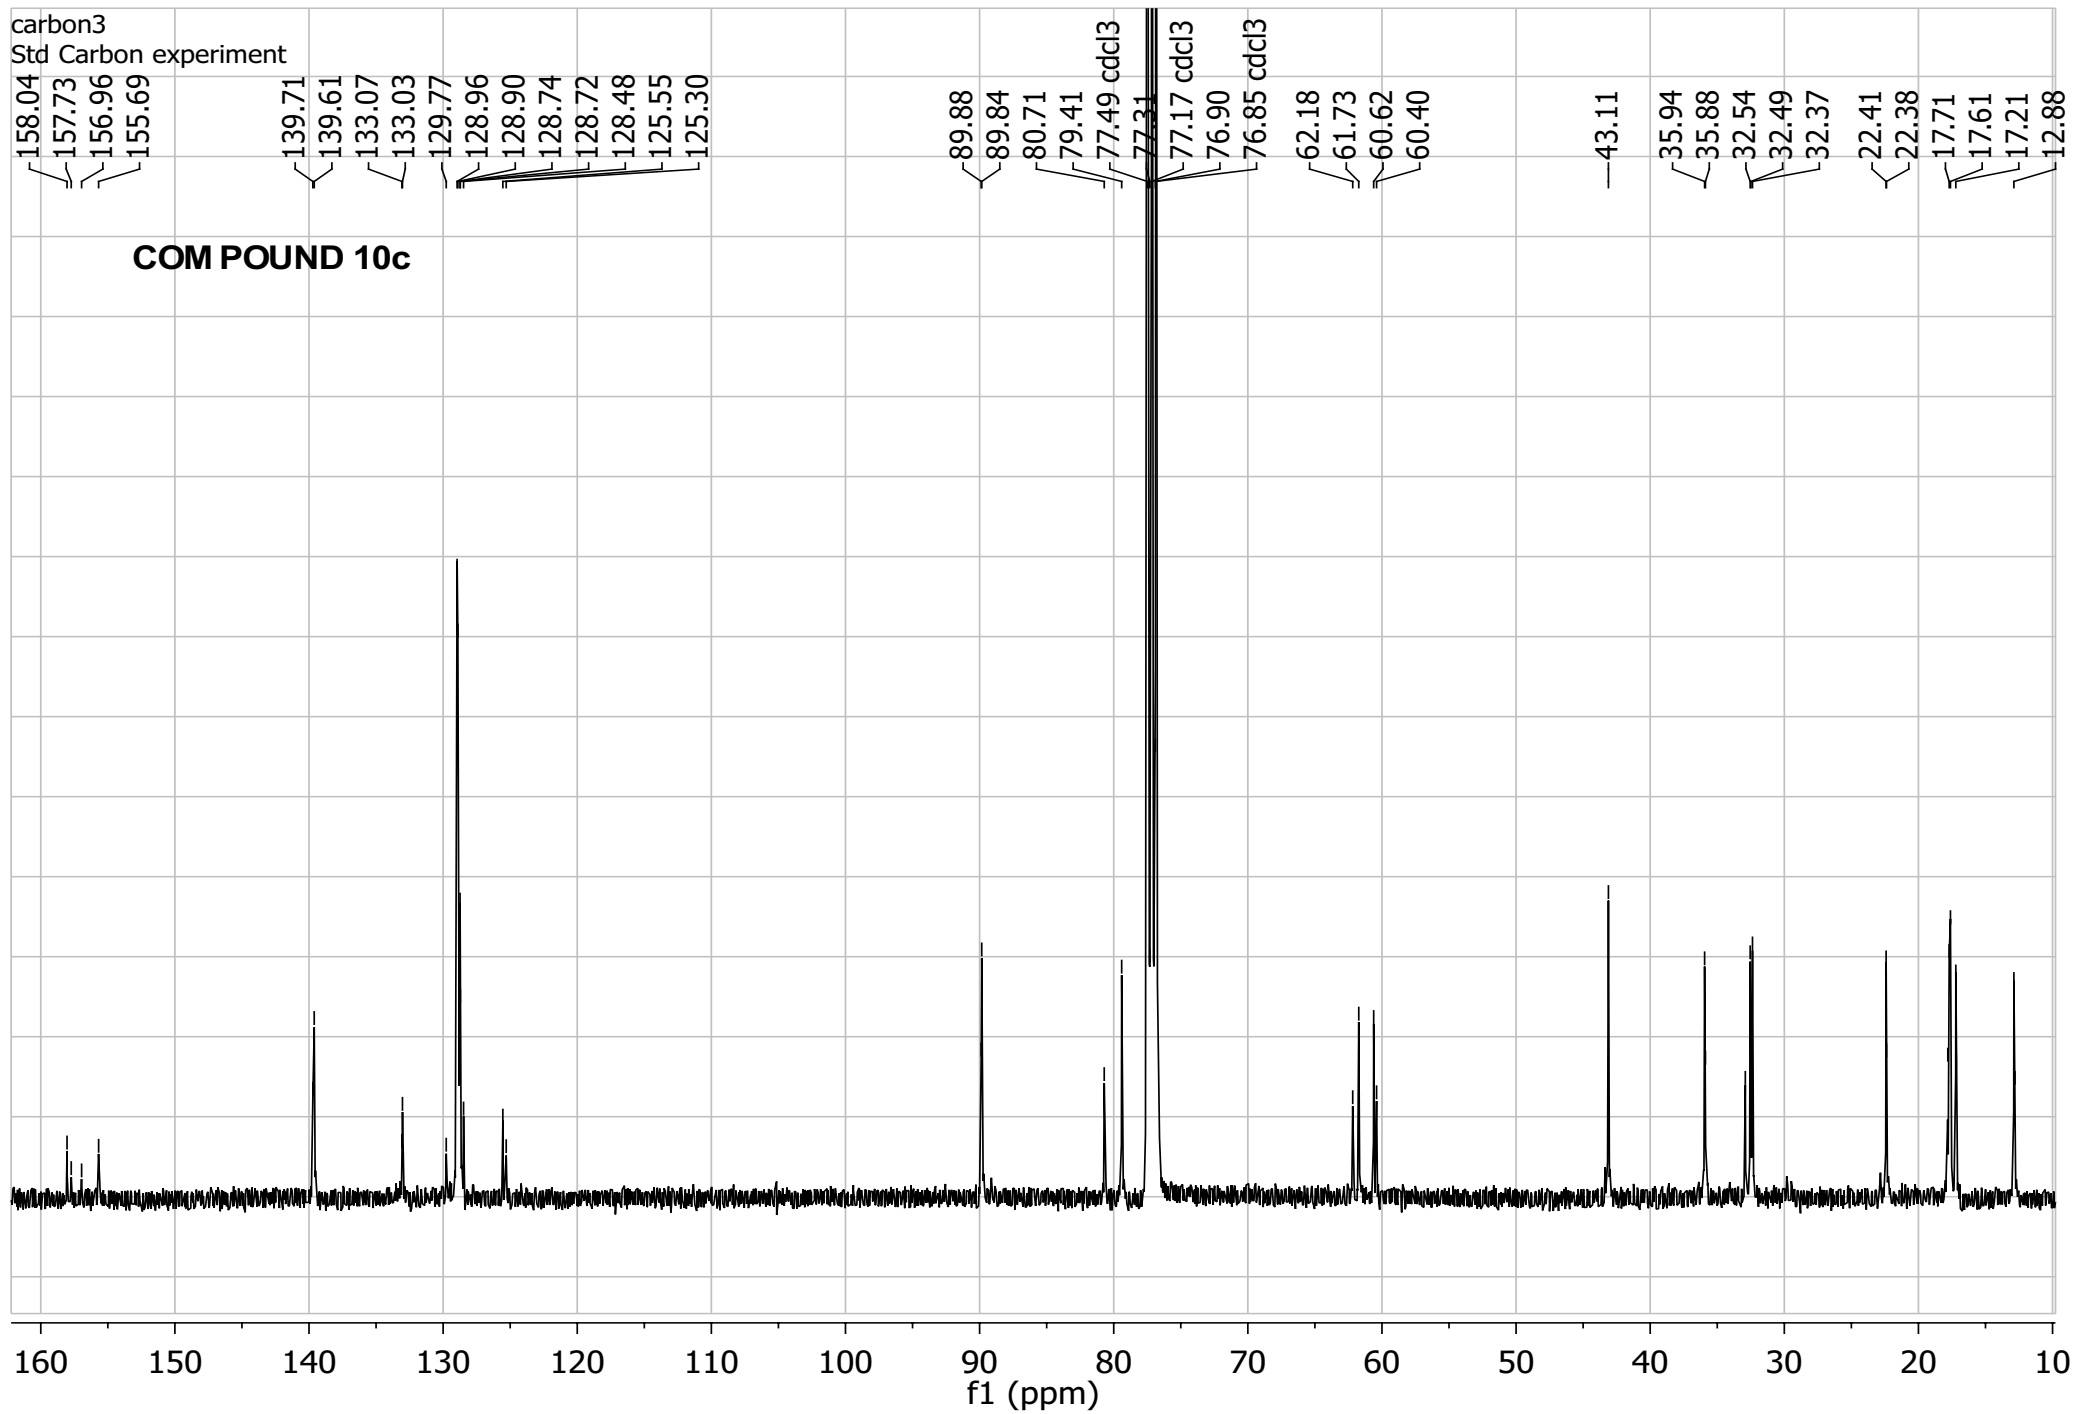



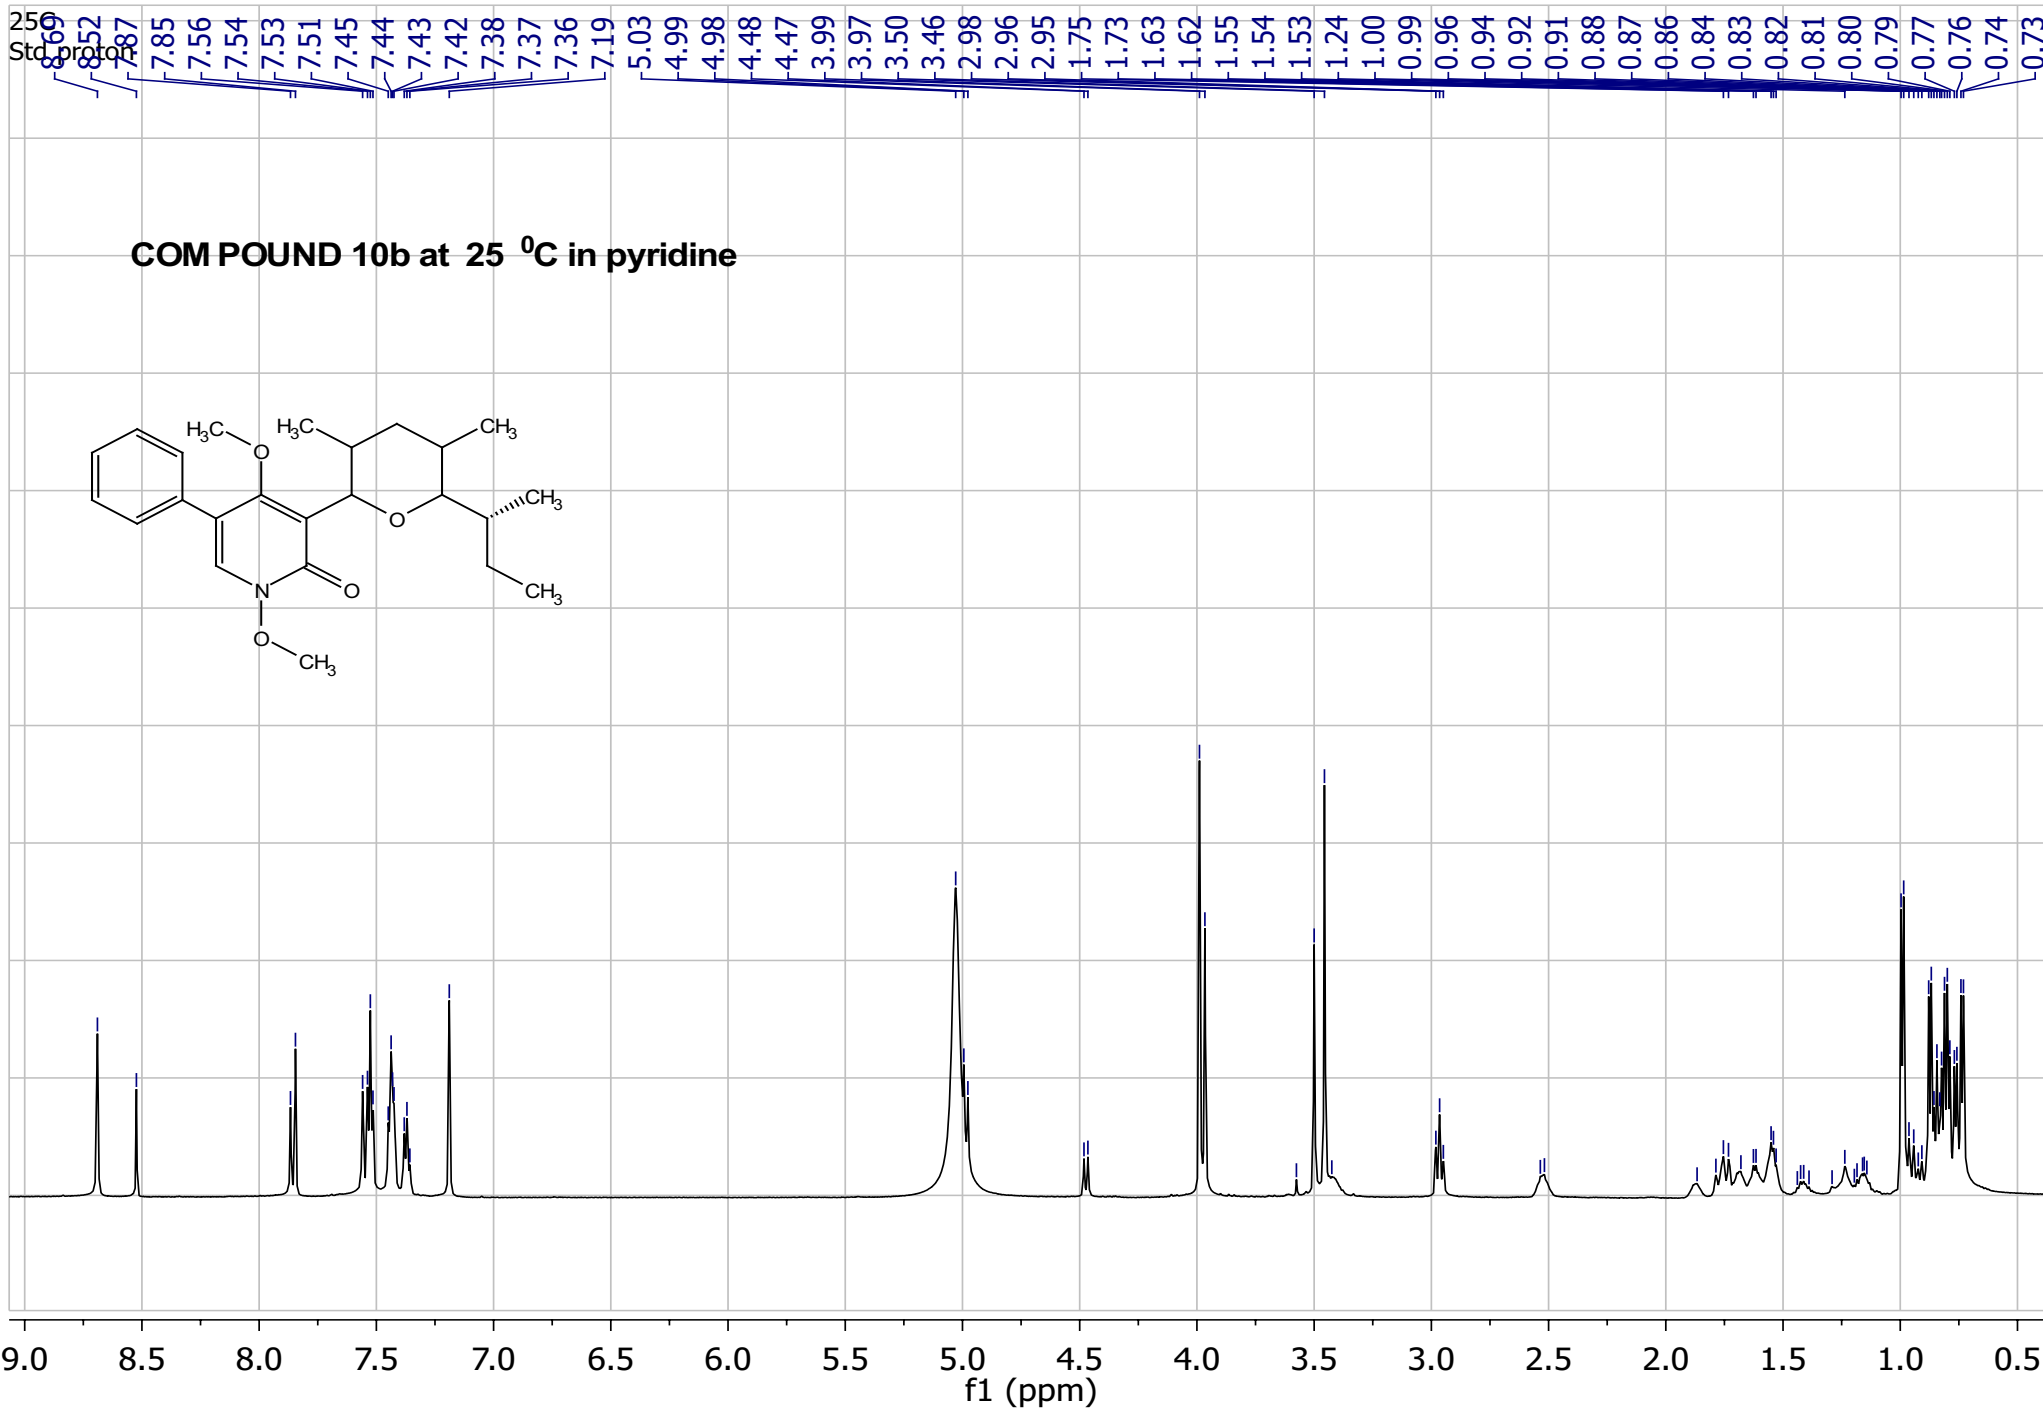

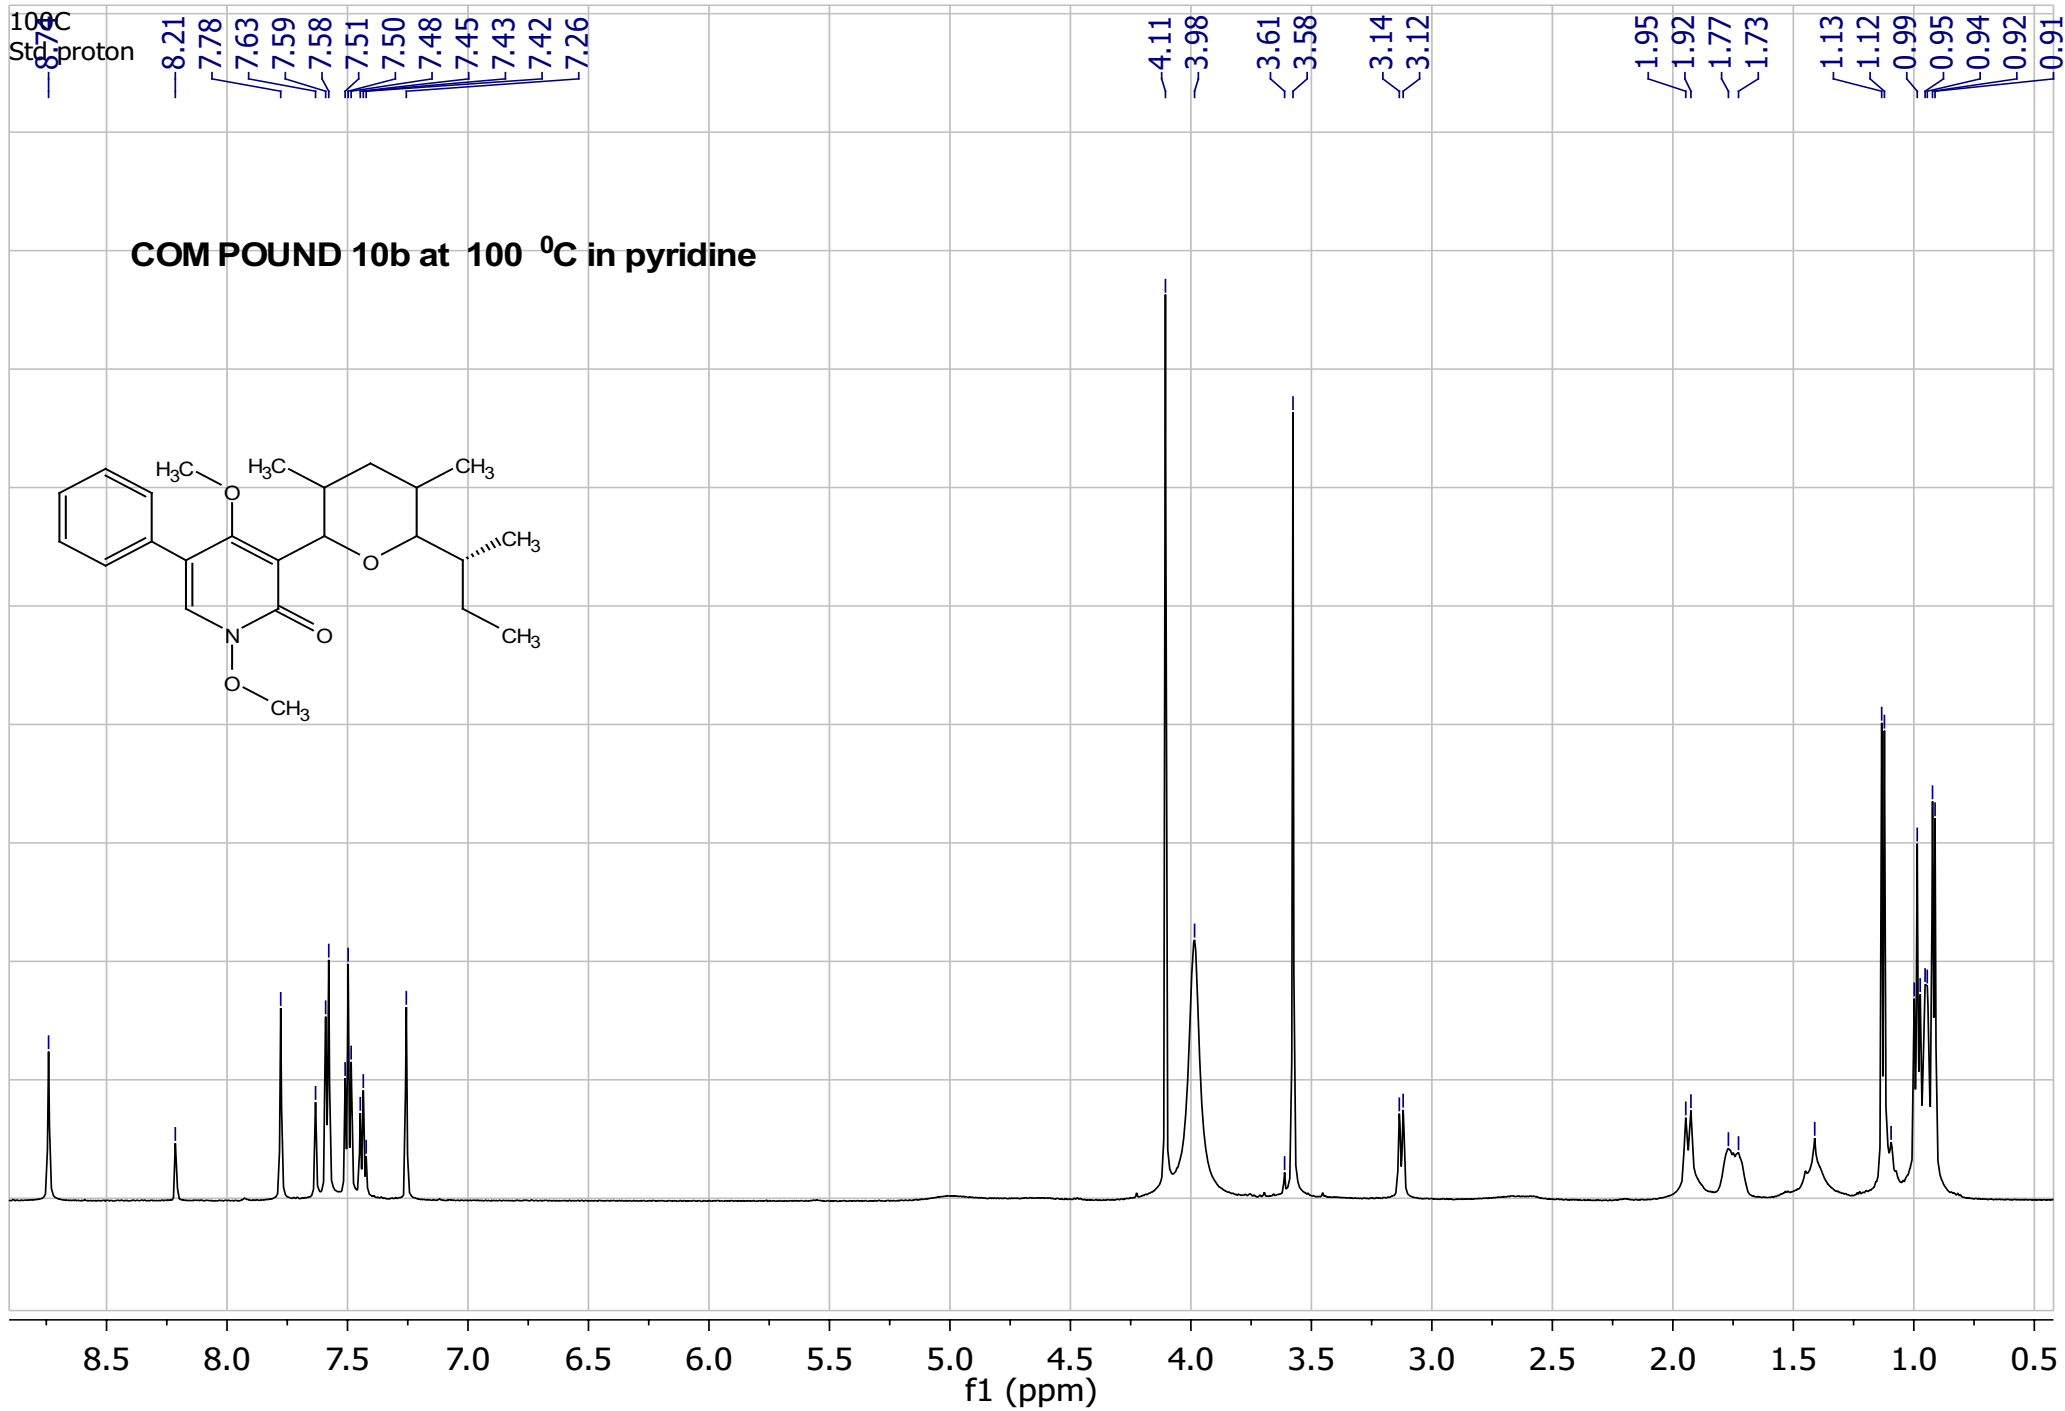

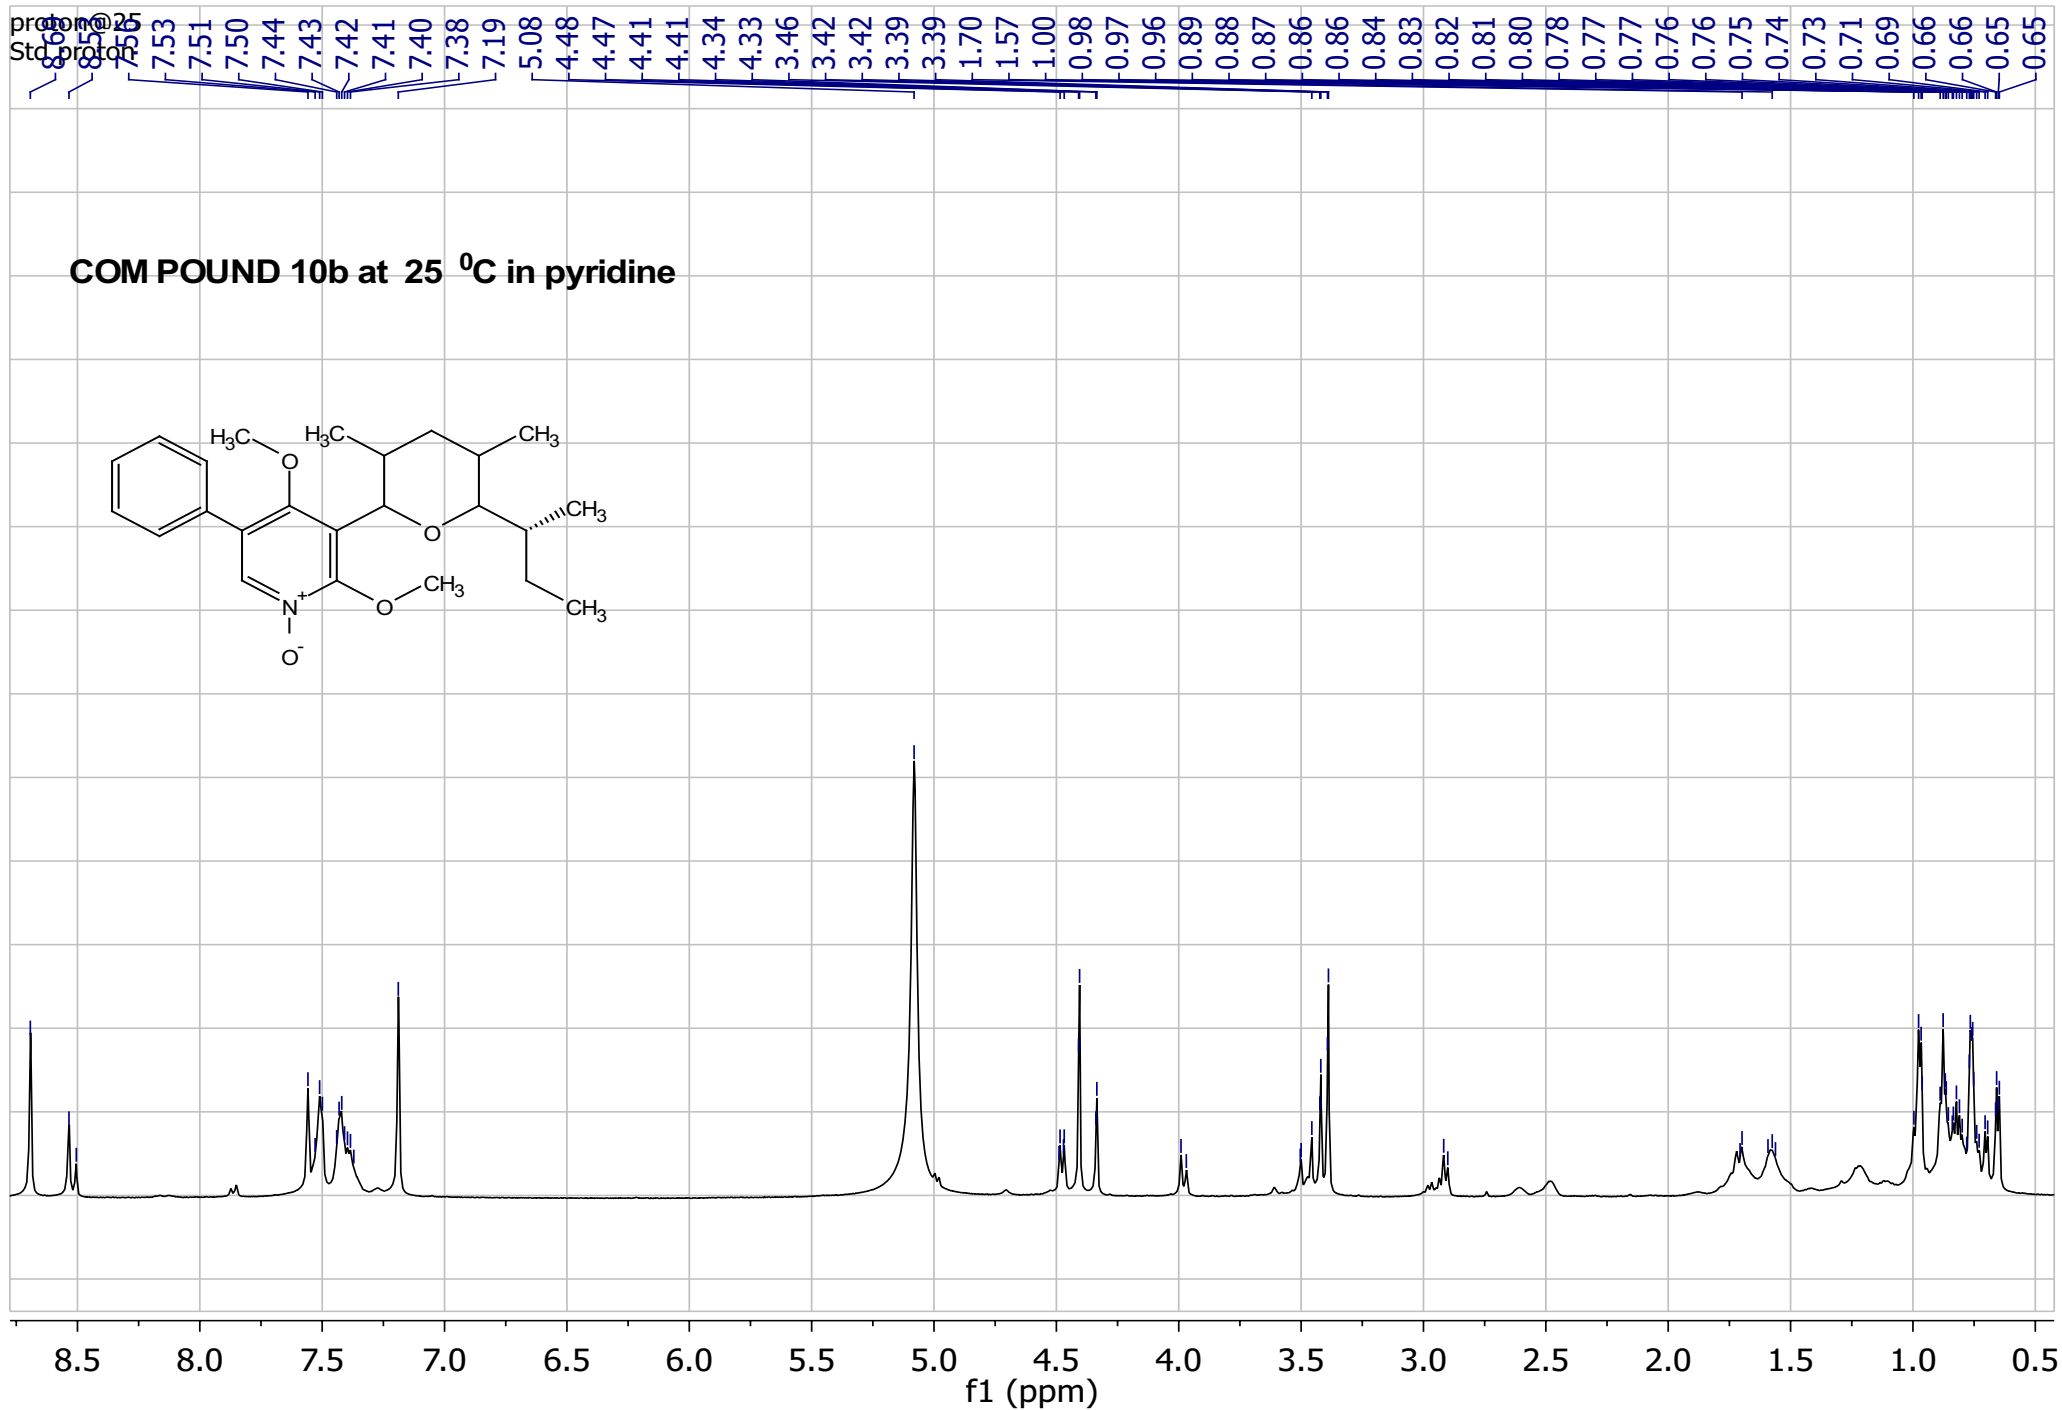

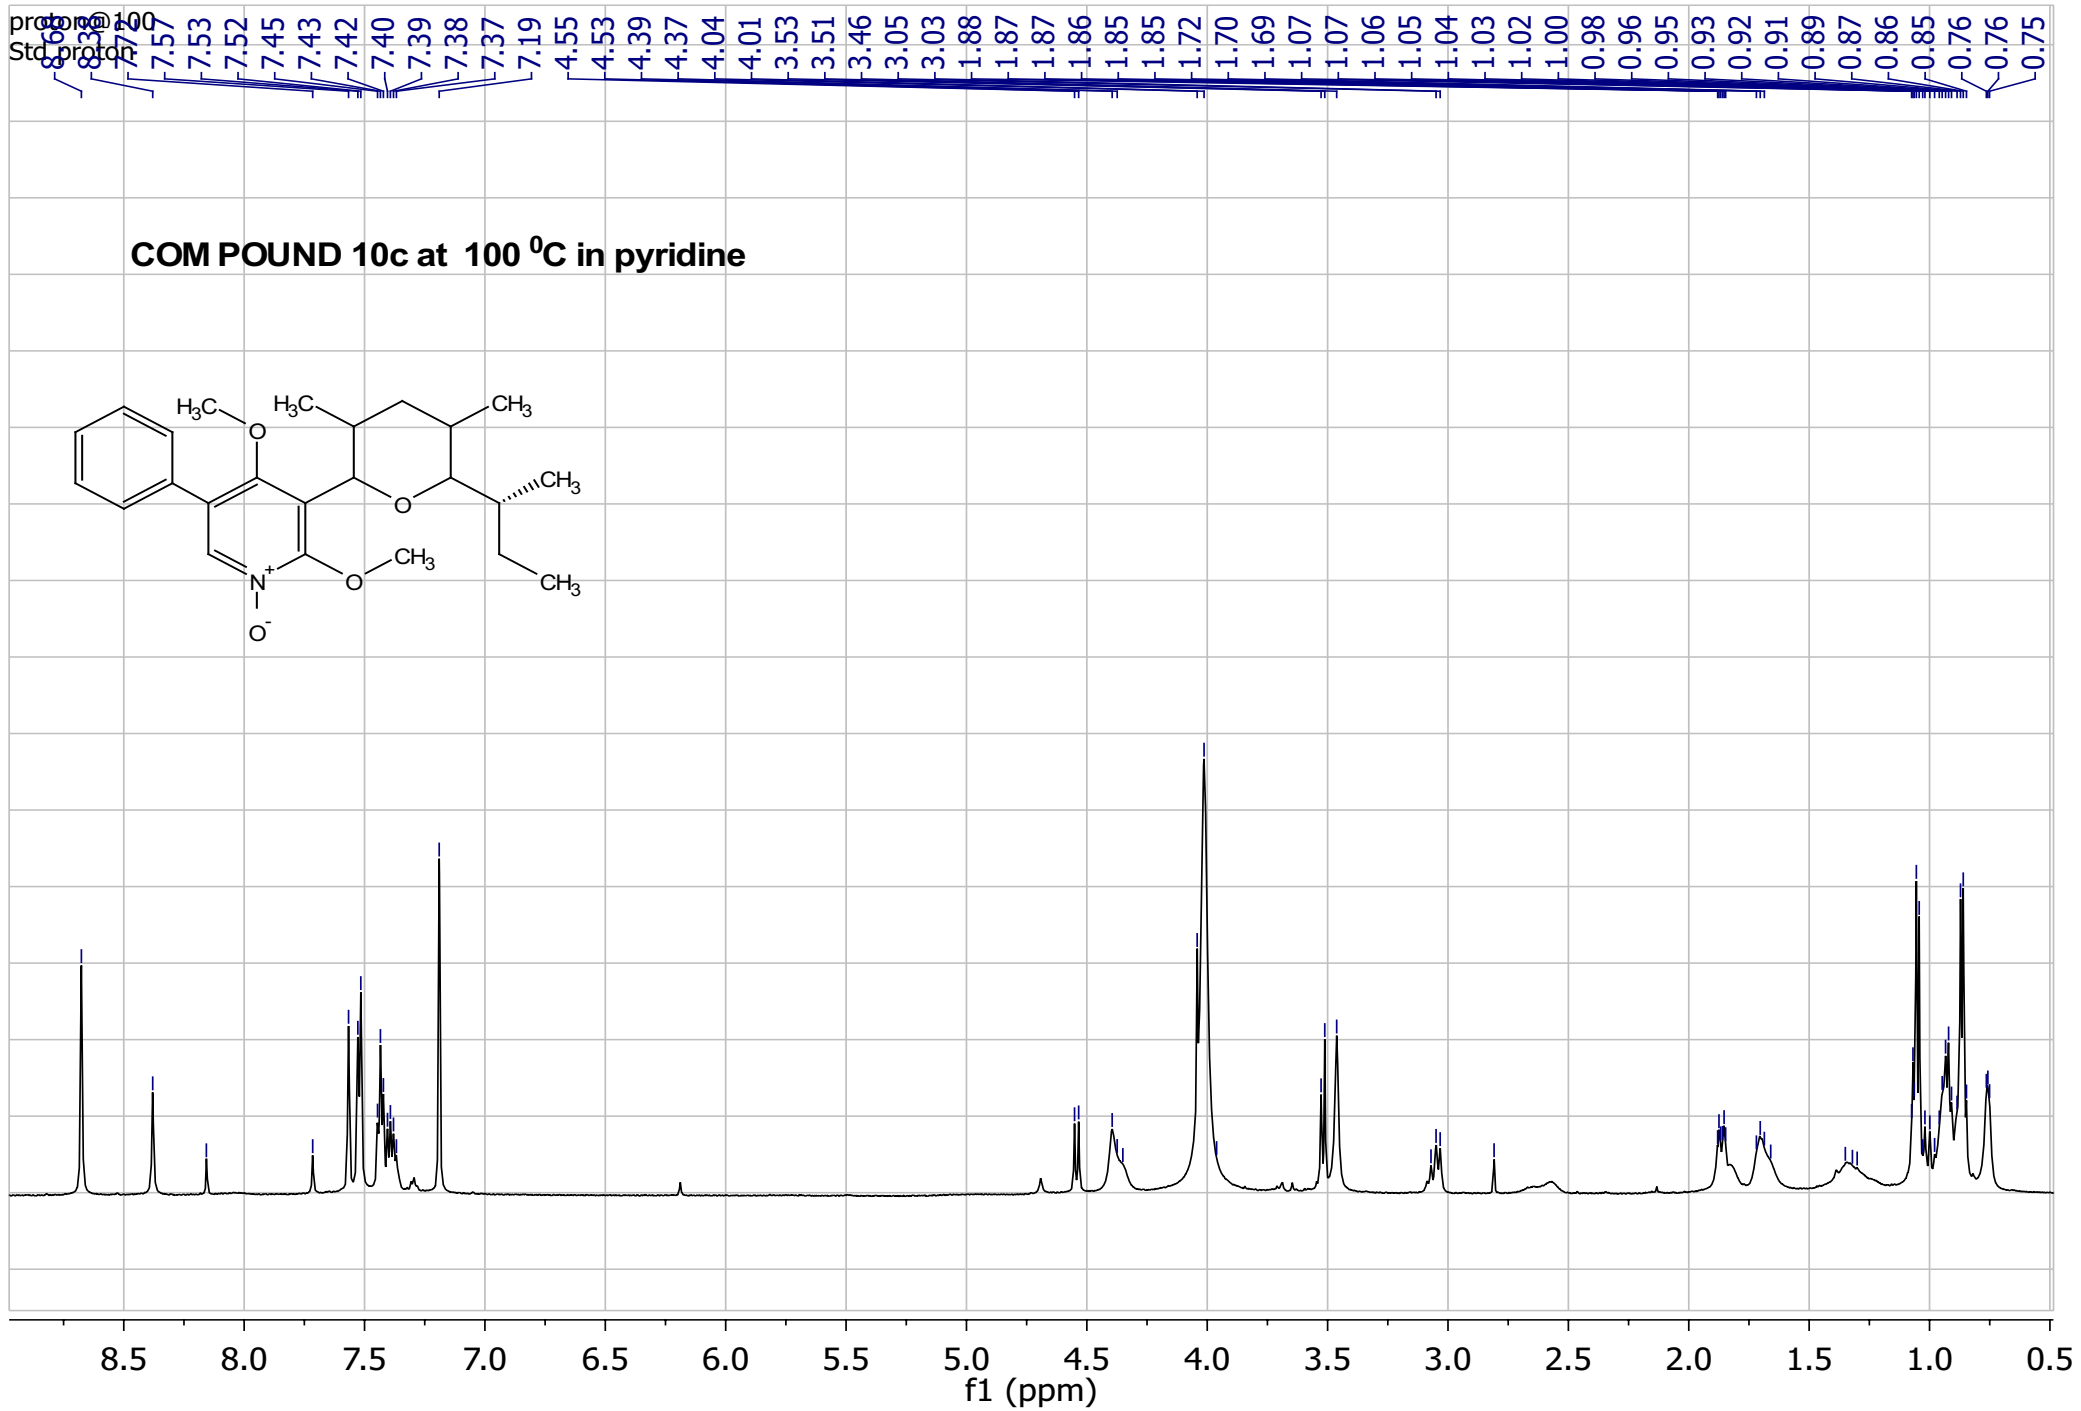

Supplement: NIHMS372945-supplement-1_si_001.pdf [file NIHMS372945-supplement-1_si_001.pdf]
